# Supplementary material for: Second-Generation JK-206 Targets the Oncogenic Signal Mediator RHOA in Gastric Cancer
Source: MDPI journal article supplement (doi:10.3390/cancers14071604), 2022-03-22
Supplement: s1 [file s1]

# Second-generation JK-206 targets the oncogenic signal mediator RHOA in gastric cancer

Myeonghun Beak, Sungjin Park, and Jin-Hee Kim et al.

## Supplementary data

### Contents

Figure S1. RHOA inhibitors suppress cell growth and migration in GC.

Figure S2. Cell viability assay at 2  $\mu$ M treatment.

Figure S3. Expression patterns of the DEGs (depicted in Figure 4b) in JK-206, JK-312, and DMSO treatments in GC cells.

Figure S4. JK-206 and JK-312 treatments in GC cells down-regulated hallmark gene sets of Myc targets, G2/M checkpoint, and E2F targets compared to the DMSO treatment in GC cells.

Figure S5. Expression patterns of the DEGs (depicted in Figure 4b) by another RHOA inhibitors in GC cells.

Figure S6. Correlations with *RHOA* and DEGs (depicted in Figure 4b) and expression patterns of the DEGs by knockdown and knockout of *RHOA* in GC and prostate cancer cells.

Figure S7. Differentially expressed genes in association with *RHOA* expression level in an independent GC dataset (GSE36968).

Method S1. Synthesis of hydrazide derivatives

Table S1. A list of DEGs common and uncommon to JK-206 treated (versus DMSO treated) and JK-312 treated (versus DMSO treated) GC cells.

Cell viability assay  
(Rhosin, JK-208 ~ JK-214)

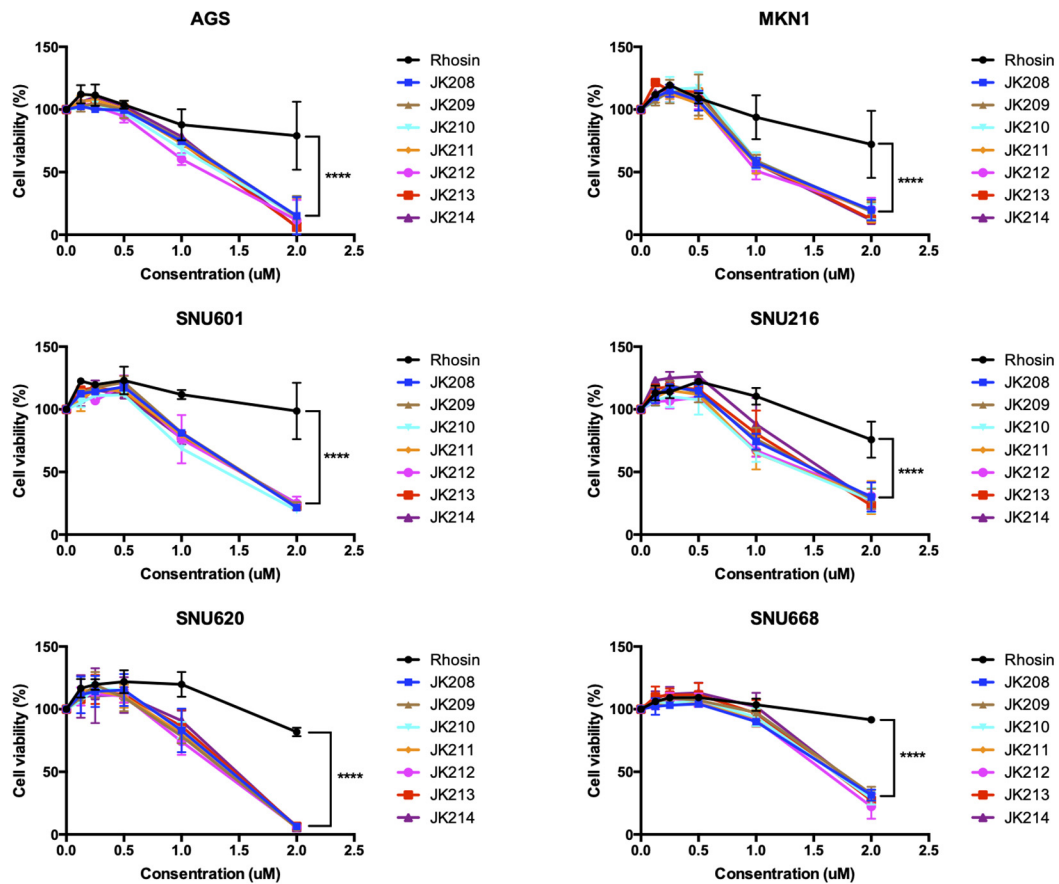

Cell viability assay  
(Rhosin, JK-301 ~ JK-307)

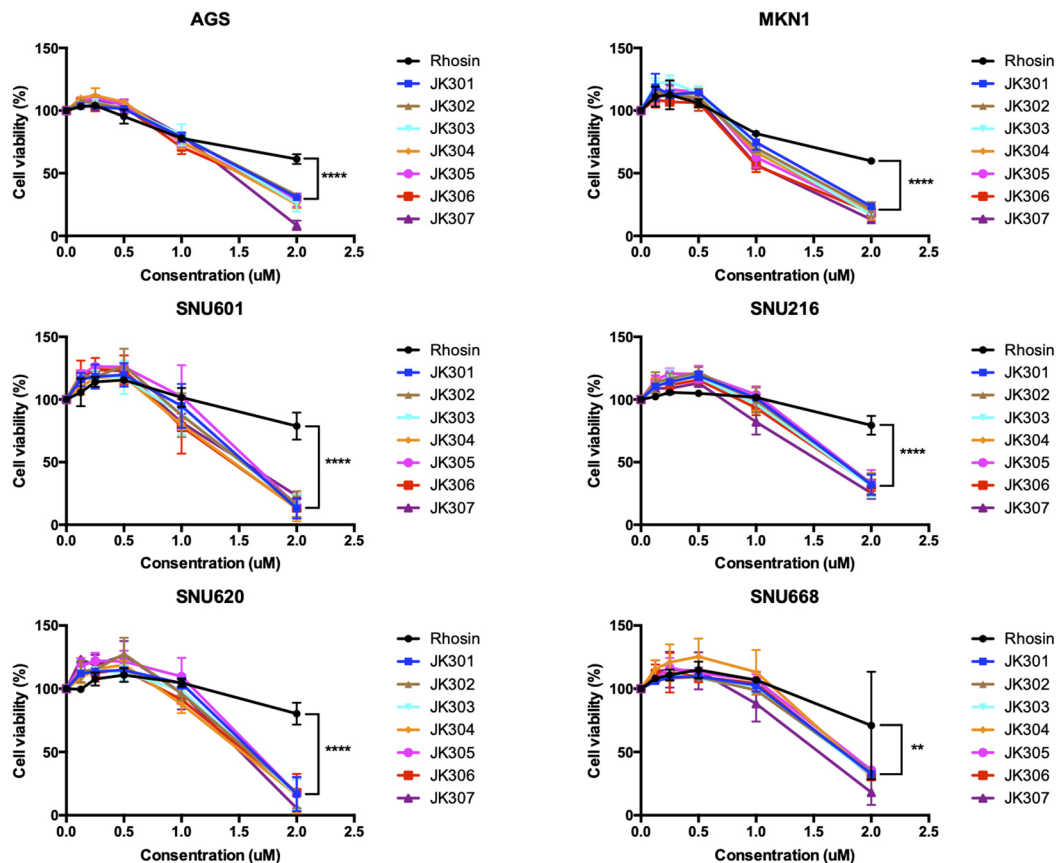

**Figure S1.** RHOA inhibitors suppress cell growth in GC. GC cell lines, AGS, MKN-1, SNU601, SNU216, SNU620, and SNU668 were treated with the 15 small molecule candidates included Rhosin (\*\*  $p$  value < 0.01, \*\*\*\*  $p$  value < 0.0001).

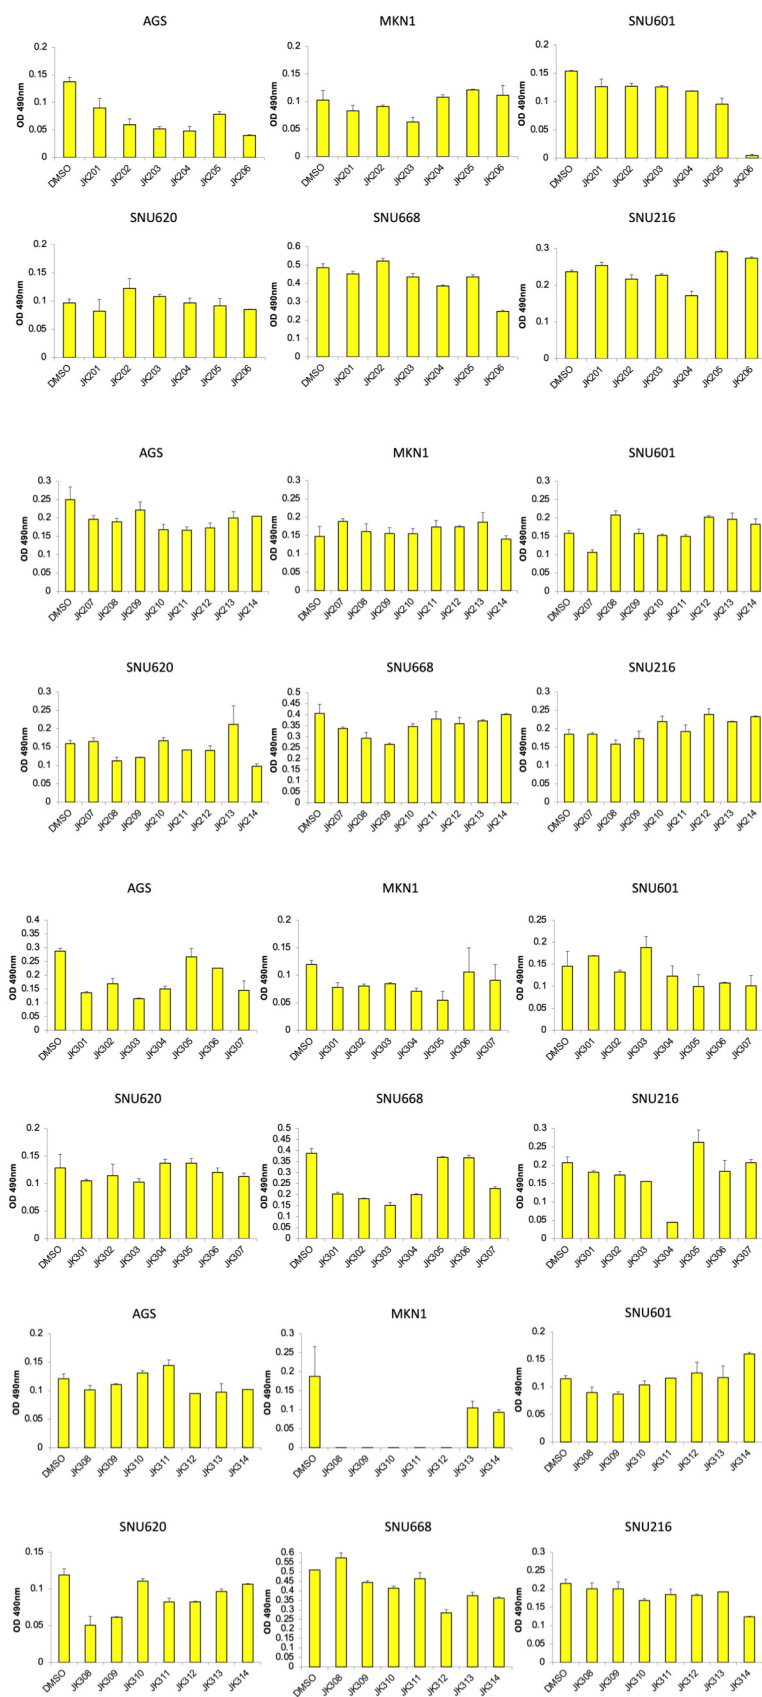

**Figure S2.** Cell viability assay at 2  $\mu$ M treatment.

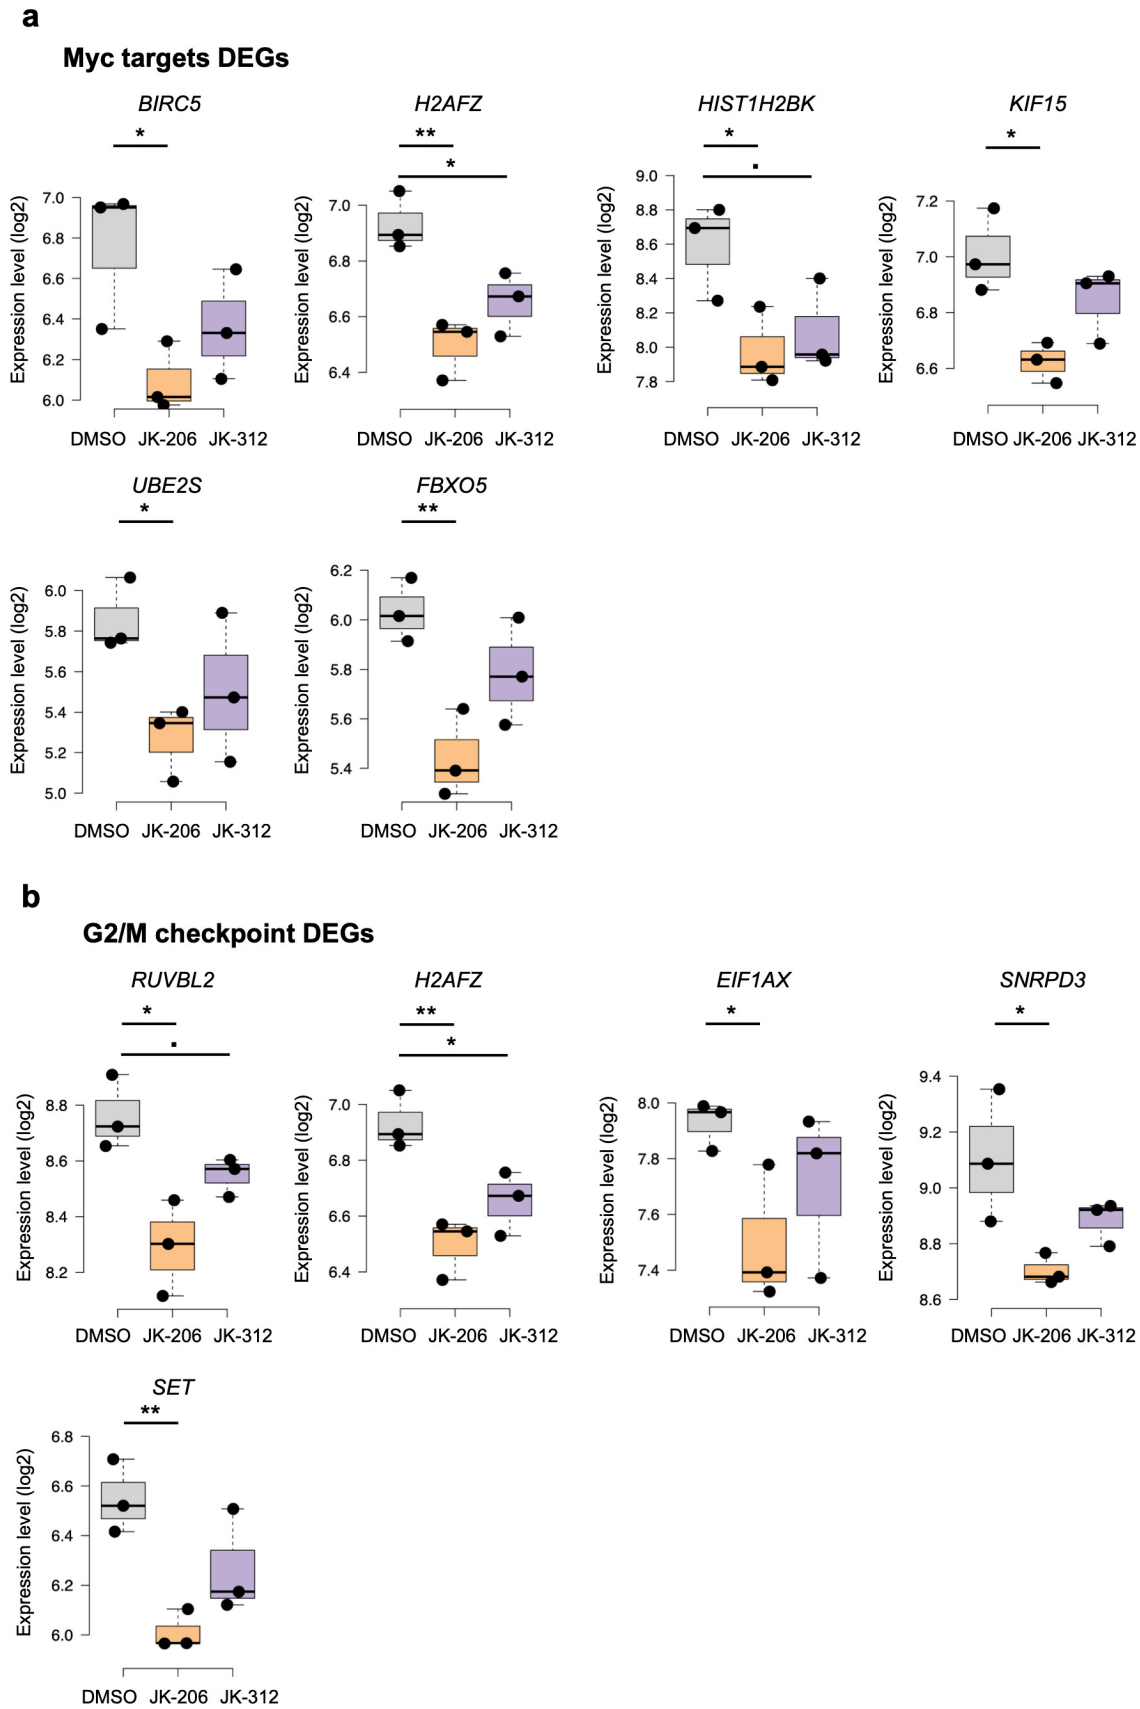

**Figure S3.** Expression patterns of the DEGs (depicted in Figure 4b) in JK-206, JK-312 and DMSO treatments in GC cells. (a) Gene expression profiles involved in the gene set of Myc targets. (b)

Gene expression profiles involved in the gene set of G2/M checkpoint.  $p$  value  $< 0.1$ ; \*,  $p$  value  $< 0.05$ ; \*\*,  $p$  value  $< 0.01$ .

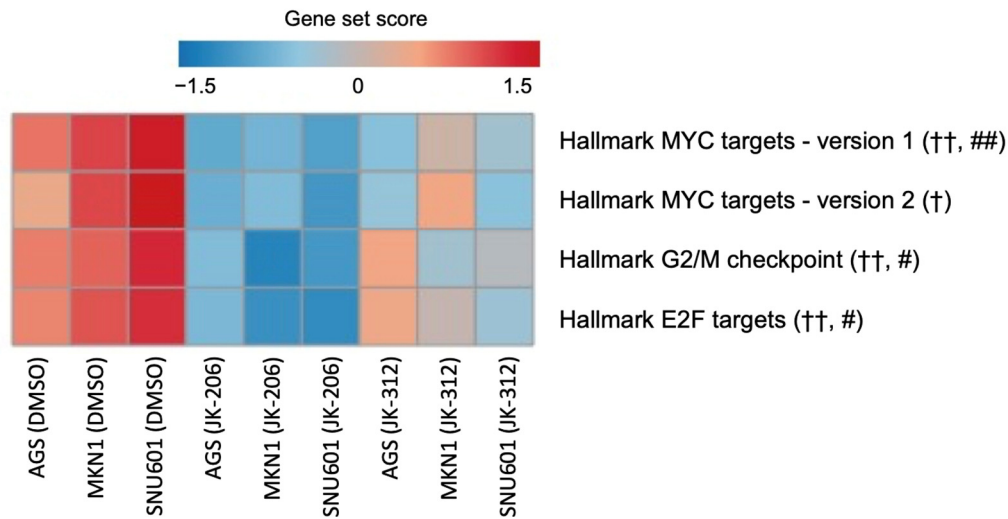

**Figure S4.** JK-206 and JK-312 treatments in GC cells down-regulated hallmark gene sets of Myc targets, G2/M checkpoint, and E2F targets compared to the DMSO treatment in GC cells. †,  $p$  value  $< 0.05$ ; ††,  $p$  value  $< 0.01$ ; JK-206 treated vs. DMSO treated GC cell lines; #,  $p$  value  $< 0.05$ ; ##,  $p$  value  $< 0.01$ ; JK-312 treated vs. DMSO treated GC cell lines (T test).

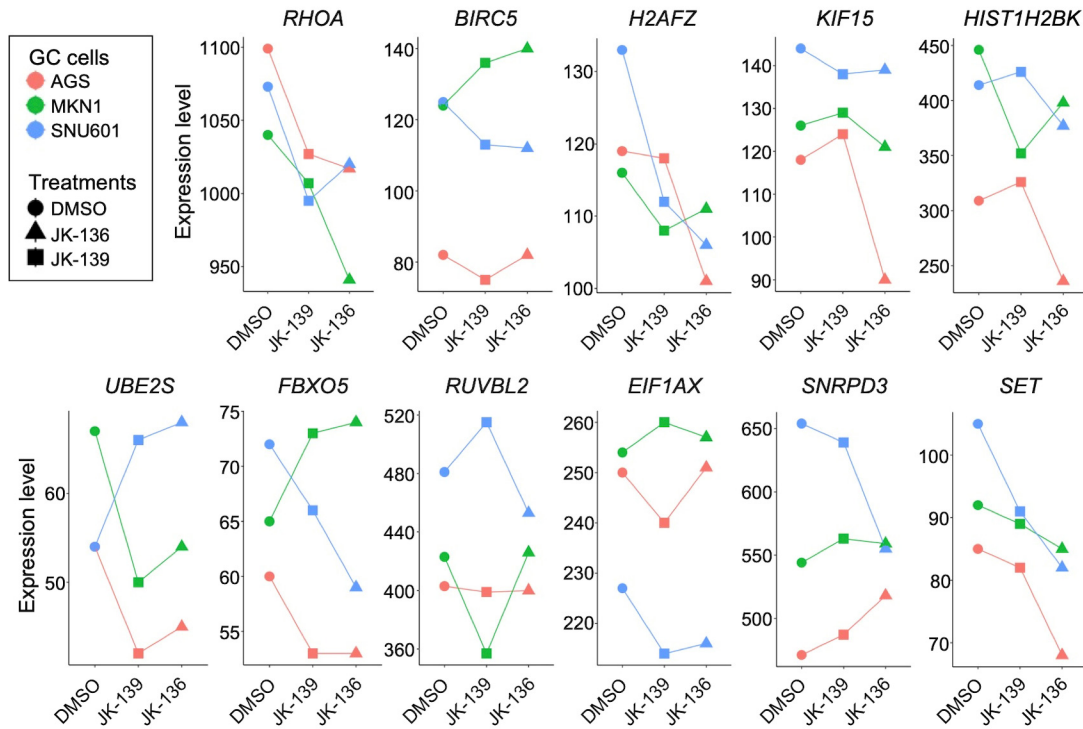

**Figure S5.** Expression patterns of the DEGs (depicted in Figure 4b) by another RHOA inhibitors in GC cells. Expression levels of *RHOA*, MYC target genes, G2/M checkpoint-related genes in JK-136-, JK-139-, and DMSO-treated GC cells. The data set was obtained from Gene Expression Omnibus (GEO) accession GSE135068 [1].



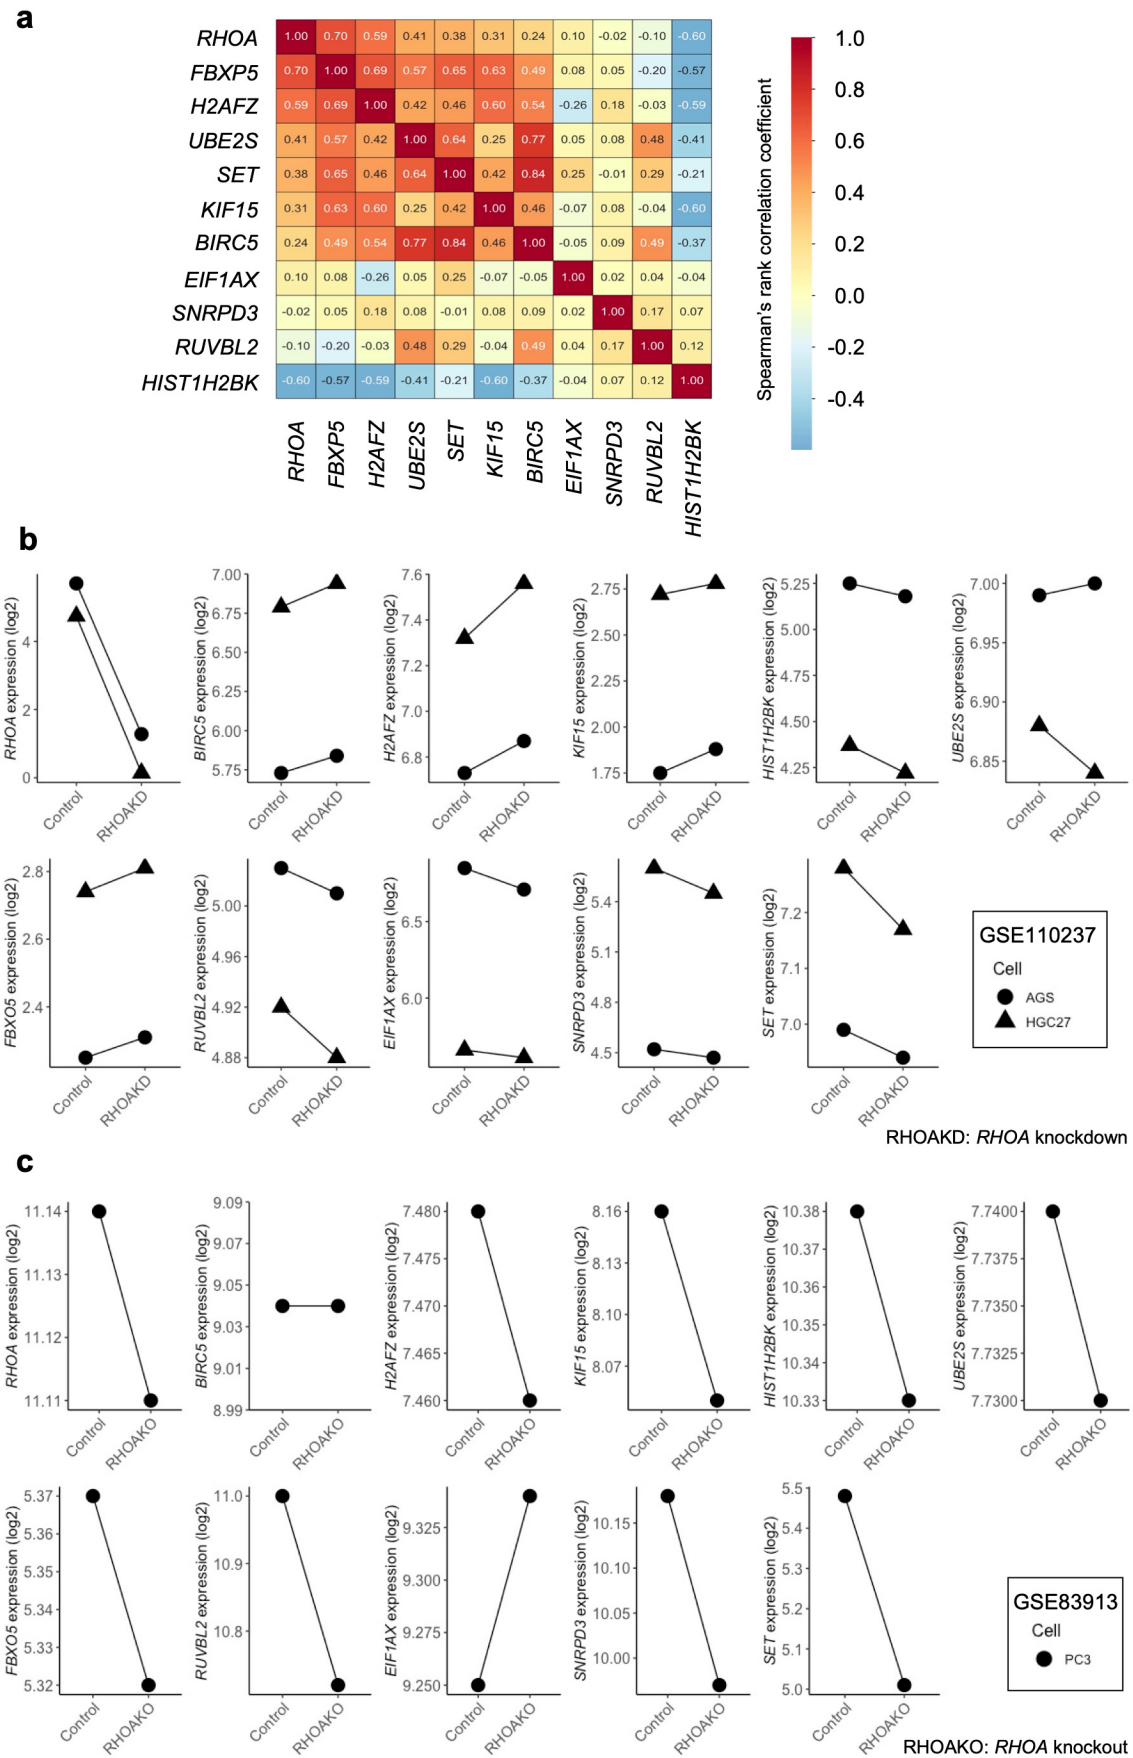

**Figure S6.** Correlations with *RHOA* and DEGs (depicted in Figure 4b) and expression patterns of the DEGs by knockdown and knockout of *RHOA* in GC and prostate cancer cells. (a) Heatmap of correlation coefficients of the ten DEGs (depicted in Figure 4b) with *RHOA* in 13 GC cell lines from

Cancer Cell Line Encyclopedia (CCLE) database [2]. **(b)** MRNA expression levels of *RHOA*, Myc target genes, G2/M checkpoint-related genes in GC cell lines (AGS and HGC27). The dataset was obtained from GEO accession GSE110237 [3]. **(c)** Expression levels of *RHOA*, Myc target genes, G2/M checkpoint-related genes in prostate cell line (PC3). The dataset was obtained from GEO accession GSE83913 [4].

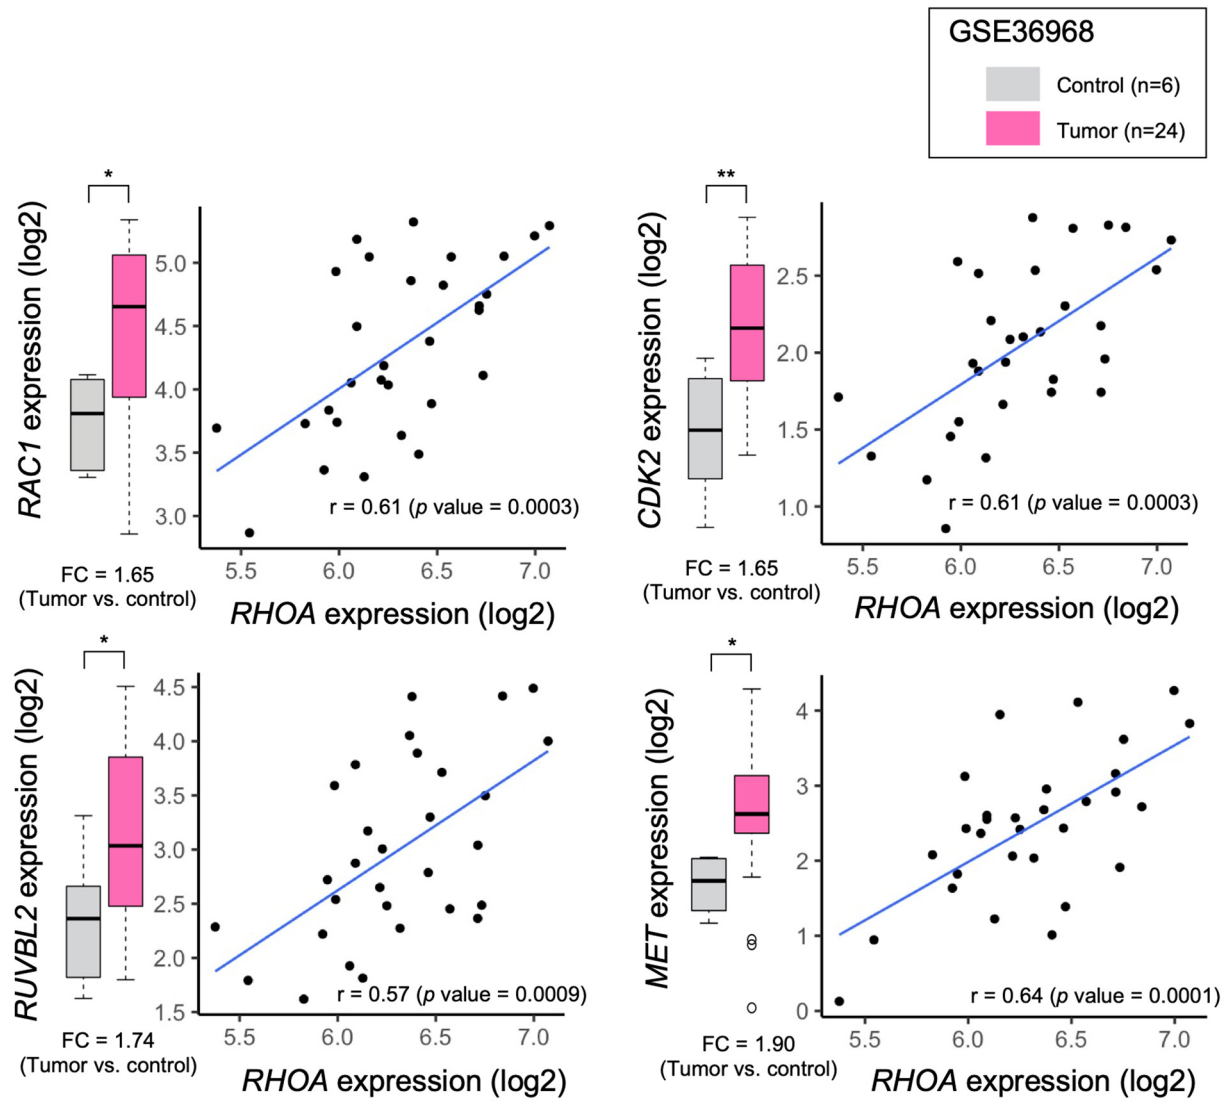

**Figure S7.** Differentially expressed genes in association with *RHOA* expression level in an independent GC dataset (GSE36968). Analyses of differentially expressed genes and Pearson's correlation coefficients were performed with 20 genes (excluding *RHOA*) from the network (Figure 5a) using the independent GC dataset (GSE36968).  $r$ : Pearson's correlation coefficient. Significance: \*,  $p$  value < 0.05; \*\*,  $p$  value < 0.01.

## Supplementary Method S1

### Synthesis of hydrazide derivatives

**(E)-N'-(4-phenoxybenzylidene)benzenesulfonohydrazide (JK-201):** a white solid; Yield: 78%; IR (ATR)  $\text{cm}^{-1}$  3207, 1589, 1509, 1486, 1448;  $^1\text{H}$  NMR (400 MHz,  $\text{DMSO-}d_6$ )  $\delta$  11.46 (s, 1H), 7.89 (m, 3H), 7.61 (m, 5H), 7.41 (t,  $J = 8.0$  Hz, 2H), 7.18 (t,  $J = 8.0$  Hz, 1H), 7.04 (d,  $J = 8.0$  Hz, 2H), 6.98 (d,  $J = 8.0$  Hz, 2H);  $^{13}\text{C}$  NMR (100 MHz,  $\text{DMSO-}d_6$ )  $\delta$  158.45, 155.72, 146.58, 139.02, 135.47, 132.99, 130.16, 129.21, 128.66, 127.14, 124.10, 119.27, 118.25; HRMS (ESI) calcd for  $\text{C}_{19}\text{H}_{16}\text{N}_2\text{O}_3\text{S}$   $[\text{M}+\text{H}]^+$  353.0960; found 353.0956.

**(E)-4-hydroxy-N'-(4-phenoxybenzylidene)benzohydrazide (JK-202):** a white solid; Yield: 90%; IR (ATR)  $\text{cm}^{-1}$  3171, 3027, 1642, 1604, 1585, 1561, 1502, 1486;  $^1\text{H}$  NMR (400 MHz,  $\text{DMSO-}d_6$ )  $\delta$  11.60 (s, 1H), 10.12 (s, 1H), 8.42 (s, 1H), 7.81 (d,  $J = 8.0$  Hz, 2H), 7.72 (d,  $J = 8.0$  Hz, 2H), 7.43 (t,  $J = 8.0$  Hz, 2H), 7.20 (t,  $J = 8.0$  Hz, 1H), 7.09 (d,  $J = 8.0$  Hz, 2H), 7.05 (d,  $J = 8.0$  Hz, 2H), 6.86 (d,  $J = 8.0$  Hz, 2H);  $^{13}\text{C}$  NMR (100 MHz,  $\text{DMSO-}d_6$ )  $\delta$  162.63, 160.63, 158.33, 155.80, 146.19, 130.19, 129.62, 129.55, 128.80, 124.10, 123.90, 119.34, 118.28, 114.99; HRMS (ESI) calcd for  $\text{C}_{20}\text{H}_{16}\text{N}_2\text{O}_3$   $[\text{M}+\text{H}]^+$  333.1239; found 333.1248.

**(E)-4-methoxy-N'-(4-phenoxybenzylidene)benzohydrazide (JK-203):** a white solid; Yield: 79%; IR (ATR)  $\text{cm}^{-1}$  3201, 3016, 1631, 1604, 1544, 1500;  $^1\text{H}$  NMR (400 MHz,  $\text{DMSO-}d_6$ )  $\delta$  11.69 (s, 1H), 8.43 (s, 1H), 7.91 (d,  $J = 8.0$  Hz, 2H), 7.73 (d,  $J = 8.0$  Hz, 2H), 7.43 (t,  $J = 8.0$  Hz, 2H), 7.20 (t,  $J = 8.0$  Hz, 1H), 7.07 (m, 6H), 3.83 (s, 3H);  $^{13}\text{C}$  NMR (100 MHz,  $\text{DMSO-}d_6$ )  $\delta$  162.42, 161.96, 158.40, 155.78, 146.52, 130.20, 129.47, 128.86, 125.47, 124.12, 119.36, 118.27, 113.69, 55.41; HRMS (ESI) calcd for  $\text{C}_{21}\text{H}_{18}\text{N}_2\text{O}_3$   $[\text{M}+\text{H}]^+$  347.1396; found 347.1403.

**(E)-4-fluoro-N'-(4-phenoxybenzylidene)benzohydrazide (JK-204):** a white solid; Yield: 75%; IR (ATR)  $\text{cm}^{-1}$  3235, 3044, 1644, 1599, 1588, 1550, 1500, 1485;  $^1\text{H}$  NMR (400 MHz,  $\text{DMSO-}d_6$ )  $\delta$  11.83 (s, 1H), 8.43 (s, 1H), 7.99 (m, 2H), 7.75 (d,  $J = 8.0$  Hz, 2H), 7.44 (t,  $J = 8.0$  Hz, 2H), 7.37 (t,  $J = 8.0$  Hz, 2H), 7.20 (t,  $J = 8.0$  Hz, 1H), 7.09 (d,  $J = 8.0$  Hz, 2H), 7.06 (d,  $J = 8.0$  Hz, 2H);  $^{13}\text{C}$  NMR

(100 MHz, DMSO-*d*<sub>6</sub>)  $\delta$  164.10 (d,  $J$  = 247.0 Hz), 161.94, 158.57, 155.73, 147.24, 130.29 (d,  $J$  = 9.0 Hz), 130.21, 129.89, 129.25, 128.99, 124.17, 119.41, 118.24, 115.44 (d,  $J$  = 21.0 Hz); HRMS (ESI) calcd for C<sub>20</sub>H<sub>15</sub>FN<sub>2</sub>O<sub>2</sub> [M+H]<sup>+</sup> 335.1196; found 335.1205.

**(E)-3-nitro-N'-(4-phenoxybenzylidene)benzohydrazide (JK-205):** a white solid; Yield: 89%; IR (ATR) cm<sup>-1</sup> 3186, 3031, 1645, 1600, 1554, 1529, 1504, 1488; <sup>1</sup>H NMR (400 MHz, DMSO-*d*<sub>6</sub>)  $\delta$  12.12 (s, 1H), 8.76 (s, 1H), 8.47 (s, 1H), 8.44 (d,  $J$  = 8.0 Hz, 1H), 8.37 (d,  $J$  = 8.0 Hz, 1H), 7.84 (t,  $J$  = 8.0 Hz, 1H), 7.77 (d,  $J$  = 8.0, 2H), 7.44 (t,  $J$  = 8.0 Hz, 2H), 7.21 (t,  $J$  = 8.0 Hz, 1H), 7.10 (d,  $J$  = 8.0 Hz, 2H), 7.07 (d,  $J$  = 8.0 Hz, 2H); <sup>13</sup>C NMR (100 MHz, DMSO-*d*<sub>6</sub>)  $\delta$  160.84, 158.77, 155.66, 148.19, 147.75, 134.80, 134.11, 130.29, 130.22, 129.16, 129.01, 126.30, 124.22, 122.26, 119.45, 118.22; HRMS (ESI) calcd for C<sub>20</sub>H<sub>15</sub>N<sub>3</sub>O<sub>4</sub> [M+H]<sup>+</sup> 362.1141; found 362.1140.

**(E)-N'-(4-phenoxybenzylidene)benzo[d][1,3]dioxole-5-carbohydrazide (JK-206):** a white solid; Yield: 96%; IR (ATR) cm<sup>-1</sup> 3299, 1646, 1605, 1586, 1530, 1483; <sup>1</sup>H NMR (400 MHz, DMSO-*d*<sub>6</sub>)  $\delta$  11.66 (s, 1H), 8.42 (s, 1H), 7.73 (d,  $J$  = 8.0 Hz, 2H), 7.53 (d,  $J$  = 8.0 Hz, 1H), 7.44 (m, 3H), 7.20 (t,  $J$  = 8.0 Hz, 1H), 7.07 (m, 5H), 6.13 (s, 2H); <sup>13</sup>C NMR (100 MHz, DMSO-*d*<sub>6</sub>)  $\delta$  162.07, 158.45, 155.76, 150.12, 147.40, 146.75, 130.20, 129.38, 128.89, 127.21, 124.14, 122.76, 119.38, 118.25, 108.03, 107.56, 101.81; HRMS (ESI) calcd for C<sub>21</sub>H<sub>16</sub>N<sub>2</sub>O<sub>4</sub> [M+H]<sup>+</sup> 361.1188; found 361.1193.

**(E)-N'-(4-phenoxybenzylidene)-[1,1'-biphenyl]-4-carbohydrazide (JK-207):** a white solid; Yield: 88%; IR (ATR) cm<sup>-1</sup> 3208, 3173, 3035, 1647, 1604, 1585, 1550, 1482; <sup>1</sup>H NMR (400 MHz, DMSO-*d*<sub>6</sub>)  $\delta$  11.88 (s, 1H), 8.48 (s, 1H), 8.03 (d,  $J$  = 8.0 Hz, 2H), 7.84 (d,  $J$  = 8.0 Hz, 2H), 7.76 (d,  $J$  = 8.0 Hz, 4H), 7.51 (t,  $J$  = 8.0 Hz, 2H), 7.44 (m, 3H), 7.21 (t,  $J$  = 8.0 Hz, 1H), 7.08 (m, 4H); <sup>13</sup>C NMR (100 MHz, DMSO-*d*<sub>6</sub>)  $\delta$  162.62, 158.54, 155.73, 147.14, 143.23, 139.06, 132.18, 130.21, 129.33, 129.04, 128.98, 128.29, 128.15, 126.90, 126.66, 124.17, 119.41, 118.24; HRMS (ESI) calcd for C<sub>26</sub>H<sub>20</sub>N<sub>2</sub>O<sub>2</sub> [M+H]<sup>+</sup> 393.1603; found 393.1615.

**(E)-N'-(4-phenoxybenzylidene)furan-2-carbohydrazide (JK-208):** a white solid; Yield: 76%; IR (ATR) cm<sup>-1</sup> 3164, 3016, 2998, 1641, 1585, 1542, 1503, 1474; <sup>1</sup>H NMR (400 MHz, DMSO-*d*<sub>6</sub>)  $\delta$  11.80 (s, 1H), 8.43 (s, 1H), 7.94 (s, 1H), 7.72 (d,  $J$  = 8.0 Hz, 2H), 7.43 (t,  $J$  = 8.0 Hz, 2H), 7.29 (s, 1H),

7.20 (t,  $J = 8.0$  Hz, 1H), 7.09 (d,  $J = 8.0$  Hz, 2H), 7.05 (d,  $J = 8.0$  Hz, 2H), 6.70 (s, 1H);  $^{13}\text{C}$  NMR (100 MHz, DMSO- $d_6$ )  $\delta$  158.54, 155.73, 154.11, 147.21, 146.66, 145.77, 130.20, 129.22, 128.97, 124.15, 119.39, 118.25, 114.82, 112.06; HRMS (ESI) calcd for  $\text{C}_{18}\text{H}_{14}\text{N}_2\text{O}_3$   $[\text{M}+\text{H}]^+$  307.1083; found 307.1087.

**(E)-N'-(4-phenoxybenzylidene)isonicotinohydrazide (JK-209)**: a pale yellow solid; Yield: 80%; IR (ATR)  $\text{cm}^{-1}$  3236, 3065, 1653, 1587, 1551, 1487;  $^1\text{H}$  NMR (400 MHz, DMSO- $d_6$ )  $\delta$  12.03 (s, 1H), 8.79 (d,  $J = 4.0$  Hz, 2H), 8.45 (s, 1H), 7.82 (d,  $J = 4.0$  Hz, 2H), 7.77 (d,  $J = 8.0$  Hz, 2H), 7.44 (t,  $J = 8.0$  Hz, 2H), 7.21 (t,  $J = 8.0$  Hz, 1H), 7.08 (m, 4H);  $^{13}\text{C}$  NMR (100 MHz, DMSO- $d_6$ )  $\delta$  161.54, 158.86, 155.67, 150.34, 148.44, 140.53, 130.26, 129.23, 128.97, 124.28, 121.54, 119.51, 118.24; HRMS (ESI) calcd for  $\text{C}_{19}\text{H}_{15}\text{N}_3\text{O}_2$   $[\text{M}+\text{Na}]^+$  340.1062; found 340.1056.

**(E)-N'-(4-phenoxybenzylidene)imidazo[1,2-a]pyridine-7-carbohydrazide (JK-210)**: an off-white solid; Yield: 82%; IR (ATR)  $\text{cm}^{-1}$  3201, 3043, 1670, 1630, 1586, 1549, 1504, 1485;  $^1\text{H}$  NMR (400 MHz, DMSO- $d_6$ )  $\delta$  11.98 (s, 1H), 8.67 (d,  $J = 8.0$  Hz, 1H), 8.47 (s, 1H), 8.27 (s, 1H), 8.11 (s, 1H), 7.77 (m, 3H), 7.44 (t,  $J = 8.0$  Hz, 2H), 7.38 (d,  $J = 8.0$  Hz, 1H), 7.20 (t,  $J = 8.0$  Hz, 1H), 7.08 (m, 4H);  $^{13}\text{C}$  NMR (100 MHz, DMSO- $d_6$ )  $\delta$  161.41, 158.63, 155.70, 147.49, 143.37, 135.25, 130.20, 129.19, 129.05, 128.61, 126.93, 124.17, 119.42, 118.23, 116.35, 114.47, 110.51; HRMS (ESI) calcd for  $\text{C}_{21}\text{H}_{16}\text{N}_4\text{O}_2$   $[\text{M}+\text{H}]^+$  357.1352; found 357.1359.

**(E)-N'-(4-phenoxybenzylidene)-2-phenylacetohydrazide (JK-211)**: an off-white solid; Yield: 84%; IR (ATR)  $\text{cm}^{-1}$  3210, 3055, 1667, 1586, 1555, 1504, 1486;  $^1\text{H}$  NMR (400 MHz, DMSO- $d_6$ )  $\delta$  11.56 (s, 0.4H), 11.35 (s, 0.6H), 8.20 (s, 0.4H), 7.98 (s, 0.6H), 7.70 (m, 2H), 7.31 (m, 8H), 7.05 (m, 4H), 3.97 (s, 1.2H), 3.53 (s, 0.8H);  $^{13}\text{C}$  NMR (100 MHz, DMSO- $d_6$ )  $\delta$  172.15, 166.40, 158.43, 158.16, 155.85, 155.73, 145.89, 142.21, 135.74, 135.70, 130.17, 129.36, 129.04, 128.87, 128.57, 128.29, 128.20, 126.55, 126.33, 124.12, 124.05, 119.36, 119.23, 118.38, 118.17, 41.22; HRMS (ESI) calcd for  $\text{C}_{21}\text{H}_{18}\text{N}_2\text{O}_2$   $[\text{M}+\text{H}]^+$  331.1447; found 331.1453.

**(E)-2-(4-fluorophenoxy)-N'-(4-phenoxybenzylidene)acetohydrazide (JK-212)**: a white solid; Yield: 91%; IR (ATR)  $\text{cm}^{-1}$  3213, 3071, 1691, 1607, 1587, 1504, 1488;  $^1\text{H}$  NMR (400 MHz, DMSO- $d_6$ )  $\delta$  11.54 (s, 1H), 8.32 (s, 0.4H), 7.99 (s, 0.6H), 7.71 (m, 2H), 7.43 (m, 2H), 7.10 (m, 9H), 5.11 (s, 1.2H), 4.64 (s, 0.8H);  $^{13}\text{C}$  NMR (100 MHz, DMSO- $d_6$ )  $\delta$  168.83, 164.00, 158.63, 158.29, 158.04, 157.73, 155.84, 155.68, 155.38, 154.51, 154.06, 147.32, 143.15, 130.20, 130.18, 129.02, 128.80,

124.18, 124.06, 119.42, 119.19, 118.32, 118.18, 116.10, 116.02, 115.98, 115.81, 115.75, 115.73, 115.57, 67.03, 65.22; HRMS (ESI) calcd for  $C_{21}H_{17}FN_2O_3$   $[M+H]^+$  365.1301; found 365.1294.

**(E)-2-((1H-benzo[d]imidazol-2-yl)thio)-N'-(4-phenoxybenzylidene)acetohydrazide (JK-213):** a white solid; Yield: 77%; IR (ATR)  $cm^{-1}$  3206, 3150, 3051, 1667, 1587, 1485;  $^1H$  NMR (400 MHz, DMSO- $d_6$ )  $\delta$  12.61 (s, 1H), 11.61 (s, 1H), 8.19 (s, 0.4H), 8.01 (s, 0.6H), 7.69 (m, 2H), 7.43 (t,  $J = 8.0$  Hz, 4H), 7.20 (t,  $J = 8.0$  Hz, 1H), 7.08 (m, 6H), 4.58 (s, 1.2H), 4.18 (s, 0.8H);  $^{13}C$  NMR (100 MHz, DMSO- $d_6$ )  $\delta$  168.98, 163.79, 158.59, 158.28, 155.80, 155.69, 149.81, 149.60, 146.37, 142.94, 130.20, 130.18, 129.05, 129.01, 128.74, 124.17, 124.08, 121.38, 119.42, 119.24, 118.30, 118.16, 34.25, 33.60; HRMS (ESI) calcd for  $C_{22}H_{18}N_4O_2S$   $[M+H]^+$  403.1229; found 403.1235.

**(E)-1-benzyl-N'-(4-phenoxybenzylidene)pyrrolidine-3-carbohydrazide (JK-214):** a white solid; Yield: 86%; IR (ATR)  $cm^{-1}$  3168, 3015, 1668, 1648, 1586, 1561, 1487;  $^1H$  NMR (400 MHz, DMSO- $d_6$ )  $\delta$  11.28 (s, 0.4H), 11.23 (s, 0.6H), 8.13 (s, 0.4H), 7.94 (s, 0.6H), 7.65 (m, 2H), 7.42 (t,  $J = 8.0$  Hz, 2H), 7.31 (m, 4H), 7.21 (m, 2H), 7.00-7.08 (m, 4H), 3.64 (m, 3H), 2.87 (m, 1H), 2.42-2.68 (m, 3H), 1.99 (m, 2H);  $^{13}C$  NMR (100 MHz, DMSO- $d_6$ )  $\delta$  175.21, 170.00, 158.34, 158.01, 155.90, 155.75, 145.41, 141.78, 139.10, 130.18, 130.15, 129.45, 129.31, 128.79, 128.51, 128.46, 128.44, 128.13, 128.10, 126.81, 126.75, 124.11, 124.00, 119.35, 119.15, 118.41, 118.19, 59.25, 59.16, 56.89, 56.36, 53.54, 41.47, 27.45, 26.96; HRMS (ESI) calcd for  $C_{25}H_{25}N_3O_2$   $[M+Na]^+$  422.1844; found 422.1844.

**(E)-N'-((6-(benzo[d][1,3]dioxol-5-yl)pyridin-2-yl)methylene)benzenesulfonohydrazide (JK-301):** a yellow solid; Yield: 78%; IR (ATR)  $cm^{-1}$  3229, 1588, 1566, 1504, 1459;  $^1H$  NMR (400 MHz, DMSO- $d_6$ )  $\delta$  11.92 (s, 1H), 7.97 (s, 1H), 7.83-7.92 (m, 4H), 7.61-7.68 (m, 6H), 7.02 (d,  $J = 12.0$  Hz, 1H), 6.08 (s, 2H);  $^{13}C$  NMR (100 MHz, DMSO- $d_6$ )  $\delta$  155.39, 152.02, 148.34, 147.94, 147.34, 138.85, 137.93, 133.22, 132.24, 129.36, 127.12, 120.81, 120.25, 117.66, 108.46, 106.61, 101.38; HRMS (ESI) calcd for  $C_{19}H_{15}N_3O_4S$   $[M+Na]^+$  404.0681; found 404.0691.

**(E)-N'-((6-(benzo[d][1,3]dioxol-5-yl)pyridin-2-yl)methylene)-4-hydroxybenzohydrazide (JK-302):** a white solid; Yield: 95%; IR (ATR)  $cm^{-1}$  3066, 1656, 1605, 1584, 1542, 1504;  $^1H$  NMR (400 MHz, DMSO- $d_6$ )  $\delta$  11.87 (s, 1H), 10.18 (s, 1H), 8.52 (s, 1H), 7.84-7.90 (m, 5H), 7.67 (s, 2H), 7.04 (d,  $J = 8.0$  Hz, 1H), 6.89 (d,  $J = 8.0$  Hz, 2H), 6.10 (s, 2H);  $^{13}C$  NMR (100 MHz, DMSO- $d_6$ )  $\delta$  160.85, 155.37, 153.14, 148.31, 147.97, 147.30, 137.80, 132.47, 129.82, 123.61, 120.79, 119.98, 117.93, 115.08, 108.49, 106.63, 101.39; HRMS (ESI) calcd for  $C_{20}H_{15}N_3O_4$   $[M+Na]^+$  384.0960; found 384.0953.

**(E)-N'-((6-(benzo[d][1,3]dioxol-5-yl)pyridin-2-yl)methylene)-4-methoxybenzohydrazide (JK-303):** a white solid; Yield: 98%; IR (ATR)  $\text{cm}^{-1}$  3327, 3204, 1645, 1603, 1543, 1505;  $^1\text{H}$  NMR (400 MHz,  $\text{DMSO}-d_6$ )  $\delta$  11.94 (s, 1H), 8.54 (s, 1H), 7.87-7.95 (m, 5H), 7.68 (s, 2H), 7.04-7.10 (m, 3H), 6.10 (s, 2H), 3.85 (s, 3H);  $^{13}\text{C}$  NMR (100 MHz,  $\text{DMSO}-d_6$ )  $\delta$  162.16, 155.38, 153.05, 148.32, 147.97, 147.61, 137.85, 132.45, 129.67, 125.17, 120.80, 120.05, 117.97, 113.80, 108.50, 106.62, 101.39, 55.46; HRMS (ESI) calcd for  $\text{C}_{21}\text{H}_{17}\text{N}_3\text{O}_4$   $[\text{M}+\text{Na}]^+$  398.1117; found 398.1110.

**(E)-N'-((6-(benzo[d][1,3]dioxol-5-yl)pyridin-2-yl)methylene)-4-fluorobenzohydrazide (JK-304):** a white solid; Yield: 86%; IR (ATR)  $\text{cm}^{-1}$  3265, 3070, 1648, 1599, 1547, 1501;  $^1\text{H}$  NMR (400 MHz,  $\text{DMSO}-d_6$ )  $\delta$  12.09 (s, 1H), 8.54 (s, 1H), 7.89-8.03 (m, 5H), 7.67 (m, 2H), 7.40 (t,  $J = 8.0$  Hz, 2H), 7.04 (d,  $J = 8.0$  Hz, 1H), 6.10 (s, 2H);  $^{13}\text{C}$  NMR (100 MHz,  $\text{DMSO}-d_6$ )  $\delta$  164.25 (d,  $J = 247.0$  Hz), 162.25, 155.42, 152.88, 148.33, 147.97, 139.36, 137.85, 132.40, 130.47 (d,  $J = 8.0$  Hz), 129.64, 120.80, 120.20, 118.07, 115.56 (d,  $J = 22.0$  Hz), 108.48, 106.62, 101.39; HRMS (ESI) calcd for  $\text{C}_{20}\text{H}_{14}\text{FN}_3\text{O}_3$   $[\text{M}+\text{Na}]^+$  386.0917; found 386.0913.

**(E)-N'-((6-(benzo[d][1,3]dioxol-5-yl)pyridin-2-yl)methylene)-3-nitrobenzohydrazide (JK-305):** a pale yellow solid; Yield: 93%; IR (ATR)  $\text{cm}^{-1}$  3193, 3051, 1651, 1530, 1501;  $^1\text{H}$  NMR (400 MHz,  $\text{DMSO}-d_6$ )  $\delta$  12.36 (s, 1H), 8.79 (s, 1H), 8.57 (s, 1H), 8.46 (d,  $J = 8.0$  Hz, 1H), 8.40 (d,  $J = 8.0$  Hz, 1H), 7.84-7.93 (m, 4H), 7.68 (m, 2H), 7.04 (d,  $J = 8.0$  Hz, 1H), 6.10 (s, 2H);  $^{13}\text{C}$  NMR (100 MHz,  $\text{DMSO}-d_6$ )  $\delta$  161.17, 155.46, 152.66, 149.29, 148.36, 147.97, 147.79, 137.91, 134.50, 134.21, 132.35, 130.38, 126.53, 122.39, 120.80, 120.37, 118.21, 108.49, 106.61, 101.40; HRMS (ESI) calcd for  $\text{C}_{20}\text{H}_{14}\text{N}_4\text{O}_5$   $[\text{M}+\text{H}]^+$  391.1042; found 391.1050.

**(E)-N'-((6-(benzo[d][1,3]dioxol-5-yl)pyridin-2-yl)methylene)benzo[d][1,3]dioxole-5-carbohydrazide (JK-306):** an off-white solid; Yield: 96%; IR (ATR)  $\text{cm}^{-1}$  3506, 3189, 1649, 1603, 1557, 1501, 1487;  $^1\text{H}$  NMR (400 MHz,  $\text{DMSO}-d_6$ )  $\delta$  11.91 (s, 1H), 8.52 (s, 1H), 7.87-7.92 (m, 3H), 7.68 (m, 2H), 7.56 (d,  $J = 8.0$  Hz, 1H), 7.48 (s, 1H), 7.08 (d,  $J = 8.0$  Hz, 1H), 7.05 (d,  $J = 8.0$  Hz, 1H), 6.15 (s, 2H), 6.10 (s, 2H);  $^{13}\text{C}$  NMR (100 MHz,  $\text{DMSO}-d_6$ )  $\delta$  162.36, 155.40, 152.98, 150.35, 148.33, 147.97, 147.83, 147.46, 137.86, 132.43, 126.91, 122.99, 120.80, 120.10, 118.00, 108.50, 108.11, 107.67, 106.62, 101.88, 101.39; HRMS (ESI) calcd for  $\text{C}_{21}\text{H}_{15}\text{N}_3\text{O}_5$   $[\text{M}+\text{H}]^+$  390.1090; found

規

**(E)-N'-((6-(benzo[d][1,3]dioxol-5-yl)pyridin-2-yl)methylene)-[1,1'-biphenyl]-4-carbohydrazide (JK-307):** a white solid; Yield: 93%; IR (ATR)  $\text{cm}^{-1}$  3221, 3051, 1651, 1541, 1501;  $^1\text{H}$  NMR (400



MHz, DMSO-*d*<sub>6</sub>)  $\delta$  12.13 (s, 1H), 8.58 (s, 1H), 8.06 (d, *J* = 8.0 Hz, 2H), 7.85-7.92 (m, 5H), 7.77 (d, *J* = 8.0 Hz, 2H), 7.69 (s, 2H), 7.51 (t, *J* = 8.0 Hz, 2H), 7.43 (t, *J* = 8.0 Hz, 1H), 7.05 (d, *J* = 8.0 Hz, 1H), 6.10 (s, 2H); <sup>13</sup>C NMR (100 MHz, DMSO-*d*<sub>6</sub>)  $\delta$  162.95, 155.42, 152.96, 148.33, 148.23, 147.98, 143.48, 139.01, 137.86, 132.42, 131.89, 129.06, 128.42, 128.21, 126.93, 126.74, 120.81, 120.16, 118.07, 108.50, 106.63, 101.39; HRMS (ESI) calcd for C<sub>26</sub>H<sub>19</sub>N<sub>3</sub>O<sub>3</sub> [M+H]<sup>+</sup> 422.1505; found 422.1521.

**(E)-N'-((6-(benzo[d][1,3]dioxol-5-yl)pyridin-2-yl)methylene)furan-2-carbohydrazide (JK-308):** a white solid; Yield: 90%; IR (ATR) cm<sup>-1</sup> 3216, 3052, 1651, 1585, 1563, 1547, 1504; <sup>1</sup>H NMR (400 MHz, DMSO-*d*<sub>6</sub>)  $\delta$  12.09 (s, 1H), 8.54 (s, 1H), 7.86-7.99 (m, 4H), 7.68 (s, 2H), 7.35 (s, 1H), 7.05 (d, *J* = 8.0 Hz, 1H), 6.74 (s, 1H), 6.10 (s, 2H); <sup>13</sup>C NMR (100 MHz, DMSO-*d*<sub>6</sub>)  $\delta$  155.44, 154.28, 152.85, 148.34, 148.25, 147.98, 146.37, 146.13, 137.90, 132.41, 120.83, 120.18, 118.14, 115.44, 112.19, 108.51, 106.64, 101.40; HRMS (ESI) calcd for C<sub>18</sub>H<sub>13</sub>N<sub>3</sub>O<sub>4</sub> [M+H]<sup>+</sup> 336.0984; found 336.0986.

**(E)-N'-((6-(benzo[d][1,3]dioxol-5-yl)pyridin-2-yl)methylene)isonicotinohydrazide (JK-309):** a white solid; Yield: 86%; IR (ATR) cm<sup>-1</sup> 3235, 3074, 1654, 1545, 1500, 1453; <sup>1</sup>H NMR (400 MHz, DMSO-*d*<sub>6</sub>)  $\delta$  12.28 (s, 1H), 8.82 (d, *J* = 4.0 Hz, 2H), 8.55 (s, 1H), 7.82-7.93 (m, 5H), 7.68 (m, 2H), 7.05 (d, *J* = 8.0 Hz, 1H), 6.10 (s, 2H); <sup>13</sup>C NMR (100 MHz, DMSO-*d*<sub>6</sub>)  $\delta$  161.88, 155.50, 152.62, 150.40, 149.43, 148.36, 147.98, 140.26, 137.95, 132.35, 121.56, 120.83, 120.44, 118.25, 108.51, 106.63, 101.40; HRMS (ESI) calcd for C<sub>19</sub>H<sub>14</sub>N<sub>4</sub>O<sub>3</sub> [M+H]<sup>+</sup> 347.1144; found 347.1156.

**(E)-N'-((6-(benzo[d][1,3]dioxol-5-yl)pyridin-2-yl)methylene)imidazo[1,2-*a*]pyridine-7-carbohydrazide (JK-310):** an off-white solid; Yield: 93%; IR (ATR) cm<sup>-1</sup> 2964, 1655, 1609, 1535, 1518, 1503; <sup>1</sup>H NMR (400 MHz, DMSO-*d*<sub>6</sub>)  $\delta$  12.22 (s, 1H), 8.69 (d, *J* = 8.0 Hz, 1H), 8.57 (s, 1H), 8.31 (s, 1H), 8.13 (s, 1H), 7.91 (m, 3H), 7.79 (s, 1H), 7.68 (m, 2H), 7.40 (d, *J* = 4.0 Hz, 1H), 7.04 (d, *J* = 8.0 Hz, 1H), 6.10 (s, 2H); <sup>13</sup>C NMR (100 MHz, DMSO-*d*<sub>6</sub>)  $\delta$  161.74, 155.44, 152.83, 148.56, 148.34, 147.97, 143.34, 137.85, 135.39, 132.39, 128.26, 127.02, 120.81, 120.22, 118.12, 116.65, 114.57, 110.48, 108.48, 106.63, 101.39; HRMS (ESI) calcd for C<sub>21</sub>H<sub>15</sub>N<sub>5</sub>O<sub>3</sub> [M+H]<sup>+</sup> 386.1253; found 386.1258.

**(E)-N'-((6-(benzo[d][1,3]dioxol-5-yl)pyridin-2-yl)methylene)-2-phenylacetohydrazide (JK-311):** a white solid; Yield: 84%; IR (ATR) cm<sup>-1</sup> 3202, 3052, 1665, 1542, 1500; <sup>1</sup>H NMR (400 MHz, DMSO-*d*<sub>6</sub>)  $\delta$  11.85 (s, 0.3H), 11.65 (s, 0.7H), 8.30 (s, 0.3H), 8.09 (s, 0.7H), 7.79-7.89 (m, 3H), 7.66 (m, 2H),

7.23-7.33 (m, 5H), 7.03 (d,  $J = 8.0$  Hz, 1H), 6.10 (s, 2H), 4.03 (s, 1.4H), 3.59 (s, 0.6H);  $^{13}\text{C}$  NMR (100 MHz, DMSO- $d_6$ )  $\delta$  172.55, 166.84, 155.36, 152.76, 148.31, 147.95, 146.99, 143.50, 137.82, 135.54, 135.41, 132.40, 129.42, 129.10, 128.34, 128.23, 126.64, 126.42, 120.79, 120.10, 119.90, 117.99, 117.69, 108.46, 106.62, 101.38, 41.22; HRMS (ESI) calcd for  $\text{C}_{21}\text{H}_{17}\text{N}_3\text{O}_3$   $[\text{M}+\text{H}]^+$  360.1348; found 360.1358.

**(E)-N'-((6-(benzo[d][1,3]dioxol-5-yl)pyridin-2-yl)methylene)-2-(4-**

**fluorophenoxy)acetohydrazide (JK-312):** a white solid; Yield: 89%; IR (ATR)  $\text{cm}^{-1}$  3069, 1701, 1570, 1501;  $^1\text{H}$  NMR (400 MHz, DMSO- $d_6$ )  $\delta$  11.83 (s, 1H), 8.43 (s, 0.3H), 8.08 (s, 0.7H), 7.82-7.91 (m, 3H), 7.66 (s, 2H), 6.98-7.19 (m, 5H), 6.10 (s, 2H), 5.18 (s, 1.3H), 4.70 (s, 0.7H);  $^{13}\text{C}$  NMR (100 MHz, DMSO- $d_6$ )  $\delta$  169.23, 164.52, 155.43, 155.34, 154.48, 154.01, 152.70, 152.48, 148.40, 148.33, 147.96, 144.39, 137.86, 137.75, 132.35, 120.81, 120.27, 120.07, 118.12, 117.91, 116.15, 116.07, 116.00, 115.87, 115.81, 115.78, 115.58, 108.47, 106.62, 101.39, 67.03, 65.22; HRMS (ESI) calcd for  $\text{C}_{21}\text{H}_{16}\text{FN}_3\text{O}_4$   $[\text{M}+\text{Na}]^+$  416.1023; found 416.1014.

**(E)-2-((1H-benzo[d]imidazol-2-yl)thio)-N'-((6-(benzo[d][1,3]dioxol-5-yl)pyridin-2-**

**yl)methylene)acetohydrazide (JK-313):** an off-white solid; Yield: 84%; IR (ATR)  $\text{cm}^{-1}$  3043, 2958, 1676, 1600;  $^1\text{H}$  NMR (400 MHz, DMSO- $d_6$ )  $\delta$  12.62 (s, 1H), 8.00-8.09 (m, 2H), 7.66-7.80 (m, 2H), 7.54 (m, 3H), 7.37 (s, 1H), 7.04-7.18 (m, 4H), 6.06 (m, 2H), 4.68 (s, 1.5H), 4.27 (s, 0.5H);  $^{13}\text{C}$  NMR (100 MHz, DMSO- $d_6$ )  $\delta$  169.59, 164.93, 155.36, 154.90, 151.47, 151.32, 149.65, 149.08, 148.89, 148.30, 148.23, 143.54, 139.40, 138.76, 136.10, 135.49, 131.43, 124.73, 121.65, 121.46, 121.20, 121.09, 117.33, 117.03, 110.39, 110.31, 108.70, 107.28, 106.57, 101.64, 101.53, 34.59, 33.28; HRMS (ESI) calcd for  $\text{C}_{22}\text{H}_{17}\text{N}_5\text{O}_3\text{S}$   $[\text{M}+\text{H}]^+$  432.1130; found 432.1138.

**(E)-N'-((6-(benzo[d][1,3]dioxol-5-yl)pyridin-2-yl)methylene)-1-benzylpyrrolidine-3-**

**carbohydrazide (JK-314):** a white solid; Yield: 77%; IR (ATR)  $\text{cm}^{-1}$  3437, 3152, 1670, 1555, 1504;  $^1\text{H}$  NMR (400 MHz, DMSO- $d_6$ )  $\delta$  11.56 (s, 0.4H), 11.53 (s, 0.6H), 8.23 (s, 0.4H), 8.04 (s, 0.6H), 7.87 (s, 2H), 7.77 (m, 1H), 7.64 (s, 2H), 7.24-7.31 (m, 5H), 7.03 (d,  $J = 8.0$  Hz, 1H), 6.09 (s, 2H), 3.71 (m, 1H), 3.59 (m, 2H), 2.91 (m, 1H), 2.62 (m, 2H), 2.44 (m, 1H), 2.04 (m, 2H);  $^{13}\text{C}$  NMR (100 MHz, DMSO- $d_6$ )  $\delta$  175.64, 170.44, 155.32, 152.86, 148.29, 147.94, 146.52, 143.14, 139.15, 137.77, 132.41, 128.50, 128.46, 128.11, 126.80, 126.75, 120.78, 120.03, 119.81, 117.93, 117.50, 108.46, 106.61, 101.37, 59.26, 59.14, 56.81, 56.32, 53.52, 41.59, 27.41, 27.05; HRMS (ESI) calcd for  $\text{C}_{25}\text{H}_{24}\text{N}_4\text{O}_3$   $[\text{M}+\text{H}]^+$  429.1927; found 429.1931.

**Table S1. A list of DEGs common and uncommon to JK-206 treated (versus DMSO treated) and JK-312 treated (versus DMSO treated) GC cells.**

| Category                                             | JK-206 treated versus DMSO treated GC cell lines |      |       | JK-312 treated versus DMSO treated GC cell lines |      |       |
|------------------------------------------------------|--------------------------------------------------|------|-------|--------------------------------------------------|------|-------|
|                                                      | Symbol                                           | FC   | P     | Symbol                                           | FC   | P     |
| Common DEGs in JK-206 and -312 treated GC cell lines | <i>ALKAL2</i>                                    | 1.17 | 0.04  | <i>ALKAL2</i>                                    | 1.16 | 0.01  |
|                                                      | <i>ALYREF</i>                                    | 0.57 | 0.02  | <i>ALYREF</i>                                    | 0.63 | <0.05 |
|                                                      | <i>B9D2</i>                                      | 0.78 | 0.01  | <i>B9D2</i>                                      | 0.80 | 0.01  |
|                                                      | <i>C5orf49</i>                                   | 1.25 | 0.02  | <i>C5orf49</i>                                   | 1.15 | 0.03  |
|                                                      | <i>CAB39L</i>                                    | 1.42 | 0.02  | <i>CAB39L</i>                                    | 1.40 | <0.05 |
|                                                      | <i>CACNA1C-IT3</i>                               | 1.30 | 0.04  | <i>CACNA1C-IT3</i>                               | 1.24 | 0.01  |
|                                                      | <i>CACTIN</i>                                    | 0.93 | 0.04  | <i>CACTIN</i>                                    | 0.94 | 0.04  |
|                                                      | <i>CCL22</i>                                     | 1.33 | 0.03  | <i>CCL22</i>                                     | 1.20 | 0.01  |
|                                                      | <i>CCT6A</i>                                     | 0.70 | 0.02  | <i>CCT6A</i>                                     | 0.77 | <0.05 |
|                                                      | <i>CFAP20</i>                                    | 0.73 | 0.01  | <i>CFAP20</i>                                    | 0.82 | 0.03  |
|                                                      | <i>DEFB126</i>                                   | 0.87 | 0.04  | <i>DEFB126</i>                                   | 0.75 | <0.01 |
|                                                      | <i>DIRC1</i>                                     | 0.66 | <0.01 | <i>DIRC1</i>                                     | 0.82 | 0.03  |
|                                                      | <i>DNAI3</i>                                     | 1.20 | <0.05 | <i>DNAI3</i>                                     | 1.25 | 0.02  |
|                                                      | <i>DYTN</i>                                      | 1.19 | 0.04  | <i>DYTN</i>                                      | 1.34 | 0.02  |
|                                                      | <i>FAM66C</i>                                    | 0.87 | 0.04  | <i>FAM66C</i>                                    | 1.24 | <0.05 |
|                                                      | <i>FAM83D</i>                                    | 0.64 | 0.02  | <i>FAM83D</i>                                    | 0.68 | 0.03  |
|                                                      | <i>FOXMI</i>                                     | 0.70 | 0.02  | <i>FOXMI</i>                                     | 0.75 | 0.04  |
|                                                      | <i>FRZB</i>                                      | 0.86 | 0.04  | <i>FRZB</i>                                      | 0.81 | 0.03  |
|                                                      | <i>GDI2</i>                                      | 0.88 | <0.01 | <i>GDI2</i>                                      | 0.88 | 0.03  |
|                                                      | <i>GGA2</i>                                      | 0.87 | 0.03  | <i>GGA2</i>                                      | 0.84 | 0.01  |
|                                                      | <i>GPR65</i>                                     | 1.28 | 0.03  | <i>GPR65</i>                                     | 1.24 | 0.02  |
|                                                      | <i>GSTM5</i>                                     | 0.78 | 0.03  | <i>GSTM5</i>                                     | 0.79 | <0.05 |
|                                                      | <i>H1-5</i>                                      | 0.46 | 0.03  | <i>H1-5</i>                                      | 0.48 | 0.03  |
|                                                      | <i>H2AFZ</i>                                     | 0.74 | 0.01  | <i>H2AFZ</i>                                     | 0.82 | 0.04  |
|                                                      | <i>H4C11</i>                                     | 0.74 | <0.01 | <i>H4C11</i>                                     | 0.83 | 0.03  |
|                                                      | <i>HCG24</i>                                     | 1.24 | 0.01  | <i>HCG24</i>                                     | 1.13 | 0.04  |
|                                                      | <i>HMGCS2</i>                                    | 1.16 | 0.02  | <i>HMGCS2</i>                                    | 1.11 | <0.05 |
|                                                      | <i>HMGNI30</i>                                   | 0.71 | 0.03  | <i>HMGNI30</i>                                   | 0.81 | <0.01 |
|                                                      | <i>HNRNPL</i>                                    | 0.77 | 0.02  | <i>HNRNPL</i>                                    | 0.80 | 0.03  |
|                                                      | <i>KPTN</i>                                      | 0.89 | 0.02  | <i>KPTN</i>                                      | 0.84 | <0.01 |
|                                                      | <i>LIAS</i>                                      | 0.80 | 0.01  | <i>LIAS</i>                                      | 0.85 | <0.05 |
|                                                      | <i>LINC00482</i>                                 | 1.20 | 0.01  | <i>LINC00482</i>                                 | 1.22 | 0.01  |
|                                                      | <i>LINC00527</i>                                 | 1.33 | <0.01 | <i>LINC00527</i>                                 | 1.37 | 0.01  |
|                                                      | <i>LINC00534</i>                                 | 0.76 | 0.02  | <i>LINC00534</i>                                 | 0.74 | 0.02  |
|                                                      | <i>LINC00615</i>                                 | 0.84 | 0.03  | <i>LINC00615</i>                                 | 0.73 | 0.04  |

|  |                     |      |       |                     |      |       |
|--|---------------------|------|-------|---------------------|------|-------|
|  | <i>LINC00656</i>    | 0.76 | <0.01 | <i>LINC00656</i>    | 0.82 | <0.01 |
|  | <i>LINC00693</i>    | 1.16 | <0.01 | <i>LINC00693</i>    | 1.18 | 0.02  |
|  | <i>LINC01488</i>    | 0.70 | 0.01  | <i>LINC01488</i>    | 0.66 | 0.03  |
|  | <i>LINC01500</i>    | 1.28 | 0.04  | <i>LINC01500</i>    | 1.21 | 0.02  |
|  | <i>LNPI</i>         | 1.35 | 0.03  | <i>LNPI</i>         | 1.25 | 0.02  |
|  | <i>LOC100128908</i> | 1.46 | 0.01  | <i>LOC100128908</i> | 1.29 | 0.03  |
|  | <i>LOC100507291</i> | 1.41 | <0.05 | <i>LOC100507291</i> | 1.37 | 0.04  |
|  | <i>LOC101927355</i> | 0.82 | <0.05 | <i>LOC101927355</i> | 0.78 | 0.03  |
|  | <i>LOC101928093</i> | 1.16 | 0.04  | <i>LOC101928093</i> | 1.21 | <0.01 |
|  | <i>LOC101928596</i> | 0.79 | 0.04  | <i>LOC101928596</i> | 0.77 | 0.01  |
|  | <i>LOC101929646</i> | 1.17 | 0.02  | <i>LOC101929646</i> | 1.26 | 0.01  |
|  | <i>LOC102467222</i> | 1.43 | 0.03  | <i>LOC102467222</i> | 1.45 | <0.05 |
|  | <i>LOC102723530</i> | 1.19 | <0.01 | <i>LOC102723530</i> | 1.36 | <0.01 |
|  | <i>LOC102724152</i> | 1.40 | 0.01  | <i>LOC102724152</i> | 1.14 | 0.03  |
|  | <i>LOC102725168</i> | 0.78 | 0.02  | <i>LOC102725168</i> | 0.81 | 0.02  |
|  | <i>LOC102725254</i> | 1.19 | <0.05 | <i>LOC102725254</i> | 1.34 | <0.01 |
|  | <i>LOC105369981</i> | 0.91 | 0.04  | <i>LOC105369981</i> | 0.89 | 0.04  |
|  | <i>LOC105370404</i> | 1.16 | <0.05 | <i>LOC105370404</i> | 1.21 | 0.01  |
|  | <i>LOC105370954</i> | 0.74 | <0.01 | <i>LOC105370954</i> | 0.79 | <0.01 |
|  | <i>LOC105372075</i> | 1.22 | 0.03  | <i>LOC105372075</i> | 1.22 | 0.04  |
|  | <i>LOC105373256</i> | 0.78 | 0.01  | <i>LOC105373256</i> | 0.76 | <0.01 |
|  | <i>LOC105373496</i> | 0.81 | 0.03  | <i>LOC105373496</i> | 0.89 | 0.02  |
|  | <i>LOC105374424</i> | 1.35 | 0.01  | <i>LOC105374424</i> | 1.28 | 0.01  |
|  | <i>LOC105374689</i> | 1.35 | 0.02  | <i>LOC105374689</i> | 1.22 | 0.03  |
|  | <i>LOC105375052</i> | 1.29 | <0.01 | <i>LOC105375052</i> | 1.32 | 0.01  |
|  | <i>LOC105375310</i> | 1.17 | 0.02  | <i>LOC105375310</i> | 1.38 | <0.01 |
|  | <i>LOC105376150</i> | 1.43 | 0.04  | <i>LOC105376150</i> | 1.42 | 0.04  |
|  | <i>LOC105376203</i> | 1.14 | 0.02  | <i>LOC105376203</i> | 1.11 | 0.02  |
|  | <i>LOC105376647</i> | 0.74 | <0.05 | <i>LOC105376647</i> | 0.72 | 0.02  |
|  | <i>LOC105377918</i> | 1.11 | <0.01 | <i>LOC105377918</i> | 1.11 | <0.01 |
|  | <i>LOC105378065</i> | 0.91 | 0.04  | <i>LOC105378065</i> | 0.92 | 0.02  |
|  | <i>LOC105378152</i> | 1.47 | <0.01 | <i>LOC105378152</i> | 1.26 | 0.01  |
|  | <i>LOC105378459</i> | 0.83 | 0.03  | <i>LOC105378459</i> | 0.84 | 0.03  |
|  | <i>LOC105378966</i> | 1.17 | 0.02  | <i>LOC105378966</i> | 1.20 | 0.04  |
|  | <i>LOC105447648</i> | 0.89 | <0.05 | <i>LOC105447648</i> | 0.65 | 0.01  |
|  | <i>LOC106699570</i> | 1.42 | 0.02  | <i>LOC106699570</i> | 1.26 | 0.01  |
|  | <i>LOC730179</i>    | 0.78 | 0.02  | <i>LOC730179</i>    | 0.61 | <0.01 |
|  | <i>LRTM2</i>        | 1.13 | <0.05 | <i>LRTM2</i>        | 1.14 | 0.01  |
|  | <i>MEGF6</i>        | 1.30 | 0.01  | <i>MEGF6</i>        | 1.22 | 0.03  |

|  |                |      |       |                |      |       |
|--|----------------|------|-------|----------------|------|-------|
|  | <i>MELK</i>    | 0.80 | <0.01 | <i>MELK</i>    | 0.86 | 0.01  |
|  | <i>MIR19B2</i> | 0.80 | 0.04  | <i>MIR19B2</i> | 0.80 | <0.05 |
|  | <i>MIR325</i>  | 1.47 | 0.02  | <i>MIR325</i>  | 1.47 | 0.03  |
|  | <i>MIR4269</i> | 1.45 | <0.01 | <i>MIR4269</i> | 1.75 | 0.02  |
|  | <i>MIR587</i>  | 1.25 | 0.02  | <i>MIR587</i>  | 1.29 | 0.03  |
|  | <i>MIR876</i>  | 1.12 | <0.05 | <i>MIR876</i>  | 1.10 | <0.05 |
|  | <i>MIR890</i>  | 1.55 | <0.01 | <i>MIR890</i>  | 1.17 | 0.03  |
|  | <i>MND1</i>    | 0.71 | 0.04  | <i>MND1</i>    | 0.82 | 0.03  |
|  | <i>MRPS28</i>  | 0.67 | 0.01  | <i>MRPS28</i>  | 0.77 | 0.02  |
|  | <i>MUC22</i>   | 0.73 | 0.01  | <i>MUC22</i>   | 0.79 | 0.02  |
|  | <i>MYOCD</i>   | 0.80 | 0.03  | <i>MYOCD</i>   | 0.86 | 0.04  |
|  | <i>OACYLP</i>  | 1.06 | 0.03  | <i>OACYLP</i>  | 1.27 | <0.01 |
|  | <i>OR10C1</i>  | 0.78 | 0.01  | <i>OR10C1</i>  | 0.73 | <0.01 |
|  | <i>OR1F1</i>   | 0.57 | <0.01 | <i>OR1F1</i>   | 0.70 | 0.01  |
|  | <i>OR4K13</i>  | 1.34 | 0.02  | <i>OR4K13</i>  | 1.27 | 0.01  |
|  | <i>OR51A2</i>  | 0.79 | 0.04  | <i>OR51A2</i>  | 0.70 | 0.03  |
|  | <i>ORC1</i>    | 0.63 | 0.01  | <i>ORC1</i>    | 0.74 | 0.03  |
|  | <i>ORM1</i>    | 0.72 | 0.03  | <i>ORM1</i>    | 0.77 | 0.04  |
|  | <i>P2RY4</i>   | 1.21 | <0.05 | <i>P2RY4</i>   | 1.27 | 0.02  |
|  | <i>PCDH10</i>  | 1.31 | 0.02  | <i>PCDH10</i>  | 1.20 | 0.04  |
|  | <i>PDE3A</i>   | 0.87 | <0.01 | <i>PDE3A</i>   | 0.83 | 0.01  |
|  | <i>PFKFB1</i>  | 1.24 | 0.02  | <i>PFKFB1</i>  | 1.21 | 0.04  |
|  | <i>PLA1A</i>   | 1.20 | 0.02  | <i>PLA1A</i>   | 1.22 | 0.02  |
|  | <i>POLR3E</i>  | 0.84 | <0.01 | <i>POLR3E</i>  | 0.89 | 0.04  |
|  | <i>PP2D1</i>   | 1.18 | 0.02  | <i>PP2D1</i>   | 1.33 | 0.02  |
|  | <i>PTPMT1</i>  | 0.79 | 0.01  | <i>PTPMT1</i>  | 0.86 | 0.03  |
|  | <i>PTPN23</i>  | 0.86 | 0.02  | <i>PTPN23</i>  | 0.79 | 0.02  |
|  | <i>RGS7BP</i>  | 1.24 | 0.04  | <i>RGS7BP</i>  | 1.06 | 0.02  |
|  | <i>RNASEH1</i> | 0.81 | 0.01  | <i>RNASEH1</i> | 0.89 | 0.03  |
|  | <i>RPL10A</i>  | 0.83 | 0.02  | <i>RPL10A</i>  | 0.84 | 0.02  |
|  | <i>RPL36</i>   | 0.68 | 0.02  | <i>RPL36</i>   | 0.75 | 0.02  |
|  | <i>SF3B3</i>   | 0.79 | 0.02  | <i>SF3B3</i>   | 0.84 | 0.04  |
|  | <i>SLA2</i>    | 1.27 | 0.03  | <i>SLA2</i>    | 1.16 | 0.02  |
|  | <i>SLC6A5</i>  | 1.24 | 0.04  | <i>SLC6A5</i>  | 1.26 | 0.03  |
|  | <i>SLFN14</i>  | 1.20 | 0.01  | <i>SLFN14</i>  | 1.43 | 0.03  |
|  | <i>SMCO1</i>   | 1.22 | <0.01 | <i>SMCO1</i>   | 1.28 | 0.02  |
|  | <i>SP8</i>     | 1.33 | 0.04  | <i>SP8</i>     | 1.35 | <0.05 |
|  | <i>SPANXN3</i> | 1.24 | 0.01  | <i>SPANXN3</i> | 1.35 | 0.04  |
|  | <i>SRF</i>     | 0.76 | 0.04  | <i>SRF</i>     | 0.82 | 0.04  |

|                                                                    |                       |      |       |                       |      |       |
|--------------------------------------------------------------------|-----------------------|------|-------|-----------------------|------|-------|
|                                                                    | <i>SRGAP3-AS3</i>     | 0.85 | 0.02  | <i>SRGAP3-AS3</i>     | 0.75 | <0.01 |
|                                                                    | <i>SRRD</i>           | 0.79 | 0.02  | <i>SRRD</i>           | 0.83 | 0.01  |
|                                                                    | <i>SRXN1</i>          | 0.79 | 0.01  | <i>SRXN1</i>          | 0.84 | 0.03  |
|                                                                    | <i>ST8SIA6-AS1</i>    | 1.20 | <0.01 | <i>ST8SIA6-AS1</i>    | 1.27 | <0.01 |
|                                                                    | <i>STIMATE-MUSTN1</i> | 0.86 | 0.03  | <i>STIMATE-MUSTN1</i> | 0.85 | 0.01  |
|                                                                    | <i>TARID</i>          | 0.87 | 0.04  | <i>TARID</i>          | 0.80 | 0.03  |
|                                                                    | <i>TCERG1L-AS1</i>    | 0.85 | <0.05 | <i>TCERG1L-AS1</i>    | 0.85 | 0.03  |
|                                                                    | <i>THAP1</i>          | 0.79 | <0.01 | <i>THAP1</i>          | 0.85 | 0.01  |
|                                                                    | <i>TMEM218</i>        | 0.79 | <0.05 | <i>TMEM218</i>        | 0.80 | 0.03  |
|                                                                    | <i>TP53TG3HP</i>      | 1.15 | 0.02  | <i>TP53TG3HP</i>      | 1.28 | <0.01 |
|                                                                    | <i>TPM4</i>           | 0.90 | 0.01  | <i>TPM4</i>           | 0.88 | 0.02  |
|                                                                    | <i>TRHDE-AS1</i>      | 1.16 | 0.01  | <i>TRHDE-AS1</i>      | 1.25 | 0.01  |
|                                                                    | <i>TRIM64</i>         | 1.17 | 0.03  | <i>TRIM64</i>         | 1.22 | 0.02  |
|                                                                    | <i>UBALD1</i>         | 0.85 | 0.02  | <i>UBALD1</i>         | 0.75 | <0.01 |
|                                                                    | <i>VWA2</i>           | 1.27 | <0.05 | <i>VWA2</i>           | 1.41 | 0.01  |
|                                                                    | <i>ZBTB21</i>         | 1.08 | 0.01  | <i>ZBTB21</i>         | 1.07 | 0.02  |
|                                                                    | <i>ZC3H12A-DT</i>     | 1.32 | <0.01 | <i>ZC3H12A-DT</i>     | 1.22 | <0.01 |
|                                                                    | <i>ZEB2-AS1</i>       | 0.91 | 0.03  | <i>ZEB2-AS1</i>       | 0.82 | <0.05 |
|                                                                    | <i>ZNF660</i>         | 1.11 | <0.01 | <i>ZNF660</i>         | 1.20 | 0.02  |
|                                                                    | <i>ZNRD1ASP</i>       | 1.17 | 0.01  | <i>ZNRD1ASP</i>       | 1.18 | 0.03  |
|                                                                    | <i>ZSWIM2</i>         | 1.14 | 0.03  | <i>ZSWIM2</i>         | 1.19 | 0.03  |
| Uncommon<br>DEGs in JK-<br>206 or -312<br>treated GC<br>cell lines | <i>ACTL6B</i>         | 1.08 | 0.01  | <i>AARD</i>           | 0.93 | 0.03  |
|                                                                    | <i>ADAM18</i>         | 0.93 | 0.03  | <i>ABCC13</i>         | 1.14 | 0.03  |
|                                                                    | <i>ADAM28</i>         | 1.12 | 0.01  | <i>ANGPT4</i>         | 1.24 | <0.01 |
|                                                                    | <i>ADGB</i>           | 0.95 | <0.05 | <i>ANHXL</i>          | 1.14 | 0.04  |
|                                                                    | <i>ADPRS</i>          | 0.86 | 0.03  | <i>ANKRD26P3</i>      | 1.25 | 0.03  |
|                                                                    | <i>ADRA1D</i>         | 1.19 | 0.03  | <i>ANKRD7</i>         | 1.16 | 0.04  |
|                                                                    | <i>AGAP3</i>          | 1.12 | 0.04  | <i>AOAH-IT1</i>       | 0.90 | 0.02  |
|                                                                    | <i>AGBL4-IT1</i>      | 1.25 | 0.01  | <i>ATE1-AS1</i>       | 1.32 | 0.01  |
|                                                                    | <i>AGPS</i>           | 0.88 | <0.05 | <i>ATG9B</i>          | 1.25 | 0.02  |
|                                                                    | <i>AIRE</i>           | 1.17 | 0.02  | <i>AURKA</i>          | 0.78 | 0.03  |
|                                                                    | <i>AK8</i>            | 1.19 | 0.01  | <i>AVP</i>            | 1.31 | 0.04  |
|                                                                    | <i>AKR1C8</i>         | 1.20 | 0.03  | <i>BEND2</i>          | 1.32 | <0.01 |
|                                                                    | <i>ALDH1L1-AS2</i>    | 0.87 | 0.01  | <i>BEST4</i>          | 0.68 | 0.02  |
|                                                                    | <i>AMMECR1</i>        | 0.78 | <0.01 | <i>BHLHE22</i>        | 1.08 | 0.04  |
|                                                                    | <i>ANAPC10</i>        | 0.81 | 0.01  | <i>BMX</i>            | 1.09 | 0.01  |
|                                                                    | <i>ANKRD34C</i>       | 1.23 | <0.01 | <i>BNIP1L</i>         | 0.86 | 0.04  |
|                                                                    | <i>APOF</i>           | 1.12 | 0.03  | <i>BTK</i>            | 1.17 | 0.02  |
|                                                                    | <i>ARHGDIA</i>        | 0.76 | <0.05 | <i>C11orf58</i>       | 0.89 | 0.02  |

|  |                   |      |       |                      |      |       |
|--|-------------------|------|-------|----------------------|------|-------|
|  | <i>ARMC2-AS1</i>  | 1.23 | 0.02  | <i>C12orf73</i>      | 0.93 | 0.01  |
|  | <i>ARMH4</i>      | 0.81 | 0.03  | <i>C1orf147</i>      | 1.22 | 0.02  |
|  | <i>ASB11</i>      | 0.94 | 0.04  | <i>C1orf174</i>      | 0.83 | 0.04  |
|  | <i>ASB5</i>       | 1.16 | <0.05 | <i>C2orf92</i>       | 1.49 | 0.03  |
|  | <i>ASB9</i>       | 0.83 | 0.01  | <i>C4orf17</i>       | 0.80 | 0.03  |
|  | <i>ATP11A-AS1</i> | 0.92 | 0.03  | <i>C5orf52</i>       | 1.68 | 0.03  |
|  | <i>ATP13A5</i>    | 0.72 | 0.01  | <i>CACNA1C-IT2</i>   | 1.15 | 0.03  |
|  | <i>ATP2B2</i>     | 1.10 | 0.01  | <i>CALHM4</i>        | 1.18 | 0.03  |
|  | <i>B3GNT8</i>     | 0.83 | 0.04  | <i>CAPN3</i>         | 1.31 | 0.04  |
|  | <i>BCL9L</i>      | 1.15 | 0.04  | <i>CAPN7</i>         | 0.89 | 0.02  |
|  | <i>BEND3P3</i>    | 1.41 | 0.03  | <i>CCDC12</i>        | 0.86 | <0.01 |
|  | <i>BET1</i>       | 1.29 | 0.04  | <i>CCDC144NL-AS1</i> | 0.93 | 0.04  |
|  | <i>BEX1</i>       | 1.31 | 0.04  | <i>CCDC152</i>       | 0.88 | <0.05 |
|  | <i>BIRC5</i>      | 0.63 | 0.04  | <i>CCR9</i>          | 1.45 | 0.02  |
|  | <i>BRINP3-DT</i>  | 1.12 | 0.03  | <i>CD3G</i>          | 0.87 | 0.04  |
|  | <i>BTN3A2</i>     | 1.17 | 0.04  | <i>CD5</i>           | 1.23 | 0.03  |
|  | <i>BUB1</i>       | 0.82 | 0.01  | <i>CDC14A</i>        | 0.87 | 0.03  |
|  | <i>C1orf127</i>   | 1.14 | 0.01  | <i>CDH8</i>          | 1.24 | 0.04  |
|  | <i>C4orf45</i>    | 0.83 | 0.02  | <i>CDK2AP2</i>       | 0.82 | 0.03  |
|  | <i>C5orf58</i>    | 1.15 | 0.02  | <i>CDY1B</i>         | 0.88 | 0.02  |
|  | <i>C9orf57</i>    | 1.12 | 0.04  | <i>CDY2B</i>         | 0.82 | <0.05 |
|  | <i>CA6</i>        | 0.74 | 0.02  | <i>CFAP61</i>        | 0.81 | 0.01  |
|  | <i>CACNA1F</i>    | 1.23 | <0.05 | <i>CHCHD10</i>       | 0.81 | <0.05 |
|  | <i>CCNA1</i>      | 1.09 | <0.01 | <i>CHRNA3</i>        | 0.84 | 0.02  |
|  | <i>CCND2</i>      | 1.20 | 0.02  | <i>CLCNKA</i>        | 0.80 | <0.01 |
|  | <i>CCT8</i>       | 0.79 | 0.04  | <i>CLSTN3</i>        | 1.14 | 0.03  |
|  | <i>CD248</i>      | 1.14 | 0.04  | <i>CLUL1</i>         | 1.26 | 0.04  |
|  | <i>CD300LD</i>    | 1.28 | 0.04  | <i>CNOT7</i>         | 0.90 | 0.04  |
|  | <i>CD84</i>       | 1.24 | <0.05 | <i>COL25A1-DT</i>    | 0.86 | 0.02  |
|  | <i>CDH6</i>       | 0.77 | <0.01 | <i>COLEC12</i>       | 1.24 | 0.03  |
|  | <i>CEACAM22P</i>  | 0.83 | 0.01  | <i>COX4I2</i>        | 1.13 | 0.04  |
|  | <i>CEACAMP10</i>  | 1.16 | 0.01  | <i>CRCT1</i>         | 1.39 | <0.05 |
|  | <i>CELF3</i>      | 1.11 | 0.04  | <i>CSMD2</i>         | 1.11 | 0.02  |
|  | <i>CENPS-CORT</i> | 0.75 | <0.01 | <i>CT55</i>          | 1.05 | 0.03  |
|  | <i>CFAP298</i>    | 0.77 | <0.01 | <i>CT62</i>          | 1.33 | 0.01  |
|  | <i>CHAC2</i>      | 0.60 | 0.04  | <i>CTNNA3</i>        | 1.10 | 0.03  |
|  | <i>CIB3</i>       | 1.11 | <0.05 | <i>CTXND1</i>        | 1.51 | 0.01  |
|  | <i>CLDN14</i>     | 1.31 | 0.02  | <i>CWF19L1</i>       | 0.77 | <0.05 |
|  | <i>CLDN20</i>     | 0.89 | 0.04  | <i>CXCR2</i>         | 0.86 | 0.01  |

|  |                   |      |       |                     |      |       |
|--|-------------------|------|-------|---------------------|------|-------|
|  | <i>CLPP</i>       | 0.77 | 0.04  | <i>D2IS2088E</i>    | 0.80 | <0.05 |
|  | <i>CLRN1-AS1</i>  | 1.17 | 0.02  | <i>DAOA</i>         | 1.38 | <0.05 |
|  | <i>CLYBL-AS2</i>  | 1.09 | <0.05 | <i>DBH</i>          | 1.16 | 0.03  |
|  | <i>COL4A2-AS2</i> | 1.24 | 0.04  | <i>DCT</i>          | 0.87 | <0.05 |
|  | <i>COMMD4</i>     | 0.70 | 0.02  | <i>DDC-AS1</i>      | 1.17 | 0.02  |
|  | <i>CPN2</i>       | 1.27 | 0.04  | <i>DEFB110</i>      | 1.14 | 0.01  |
|  | <i>CRNN</i>       | 1.08 | 0.03  | <i>DEFB135</i>      | 0.87 | 0.03  |
|  | <i>CROCCP3</i>    | 0.78 | <0.01 | <i>DIS3L2</i>       | 1.05 | 0.04  |
|  | <i>CRX</i>        | 1.17 | 0.01  | <i>DKFZp451B082</i> | 1.58 | <0.05 |
|  | <i>CSPG4P10</i>   | 1.09 | 0.02  | <i>DKKL1</i>        | 1.25 | 0.04  |
|  | <i>CTR9</i>       | 0.88 | 0.04  | <i>DUSP29</i>       | 1.20 | 0.04  |
|  | <i>CTXN2</i>      | 1.19 | <0.05 | <i>DYNLRB2</i>      | 1.28 | 0.02  |
|  | <i>CUL9</i>       | 1.12 | 0.02  | <i>EEF2</i>         | 0.88 | 0.04  |
|  | <i>CUX1</i>       | 1.14 | 0.01  | <i>EHMT1</i>        | 1.09 | 0.04  |
|  | <i>CXCL13</i>     | 1.24 | 0.01  | <i>ELOA3BP</i>      | 1.10 | 0.03  |
|  | <i>CYLC2</i>      | 1.24 | 0.01  | <i>EPX</i>          | 1.23 | <0.05 |
|  | <i>CYP20A1</i>    | 0.86 | 0.02  | <i>EPYC</i>         | 0.85 | <0.05 |
|  | <i>CYP7A1</i>     | 0.83 | 0.04  | <i>ERVV-1</i>       | 1.19 | 0.02  |
|  | <i>DANT2</i>      | 1.24 | 0.04  | <i>ESM1</i>         | 0.90 | 0.03  |
|  | <i>DBF4B</i>      | 0.87 | 0.01  | <i>ESPN</i>         | 1.26 | 0.02  |
|  | <i>DDX20</i>      | 0.84 | 0.02  | <i>F2</i>           | 1.13 | 0.03  |
|  | <i>DEDD</i>       | 0.89 | <0.05 | <i>FABP2</i>        | 1.32 | 0.03  |
|  | <i>DENR</i>       | 0.83 | 0.03  | <i>FAHD2B</i>       | 1.72 | 0.03  |
|  | <i>DERL3</i>      | 1.23 | 0.03  | <i>FAM124B</i>      | 1.17 | 0.03  |
|  | <i>DHX9</i>       | 0.77 | 0.02  | <i>FAM167A-AS1</i>  | 1.06 | 0.01  |
|  | <i>DLGAP1</i>     | 1.15 | 0.02  | <i>FAM186A</i>      | 1.16 | 0.04  |
|  | <i>DLX2-DT</i>    | 0.86 | 0.02  | <i>FAM236A</i>      | 1.18 | 0.04  |
|  | <i>DNAI4</i>      | 1.38 | 0.02  | <i>FAR2P3</i>       | 1.49 | 0.01  |
|  | <i>DNAJB13</i>    | 1.27 | 0.04  | <i>FBXL21P</i>      | 1.16 | 0.04  |
|  | <i>DPP9</i>       | 0.83 | 0.04  | <i>FBXO47</i>       | 0.85 | 0.01  |
|  | <i>DRC1</i>       | 1.14 | 0.03  | <i>FCAMR</i>        | 0.77 | <0.05 |
|  | <i>DSCAM-IT1</i>  | 0.81 | 0.03  | <i>FCGR3B</i>       | 1.44 | <0.05 |
|  | <i>DSCR10</i>     | 1.25 | 0.01  | <i>FCN1</i>         | 1.15 | 0.01  |
|  | <i>EFCAB9</i>     | 0.88 | 0.02  | <i>FGL2</i>         | 1.23 | <0.05 |
|  | <i>EIF1AX</i>     | 0.74 | <0.05 | <i>FKBP9P1</i>      | 0.76 | <0.01 |
|  | <i>EIF4E1B</i>    | 1.12 | 0.01  | <i>FLJ41941</i>     | 0.72 | 0.02  |
|  | <i>ELAVL1</i>     | 0.77 | 0.03  | <i>FOLH1B</i>       | 1.09 | 0.01  |
|  | <i>ELMO2P1</i>    | 1.36 | 0.02  | <i>FOXR1</i>        | 1.22 | 0.03  |
|  | <i>ELOVL2-AS1</i> | 0.76 | 0.01  | <i>FREM2-AS1</i>    | 1.33 | <0.01 |



|  |                   |      |       |                    |      |       |
|--|-------------------|------|-------|--------------------|------|-------|
|  | <i>EMC8</i>       | 0.78 | 0.01  | <i>FXYD1</i>       | 1.21 | 0.03  |
|  | <i>ENPP3</i>      | 1.31 | <0.05 | <i>GARIN4</i>      | 1.18 | 0.02  |
|  | <i>EOLA1-DT</i>   | 1.31 | 0.02  | <i>GLRB</i>        | 0.85 | 0.03  |
|  | <i>ERMN</i>       | 1.25 | 0.04  | <i>GOLGA6L7</i>    | 1.70 | 0.01  |
|  | <i>ESPL1</i>      | 0.81 | 0.02  | <i>GP9</i>         | 1.25 | 0.02  |
|  | <i>FABP5P3</i>    | 0.79 | 0.02  | <i>GPR12</i>       | 0.95 | <0.01 |
|  | <i>FAM172BP</i>   | 1.12 | 0.02  | <i>GPR182</i>      | 1.13 | 0.04  |
|  | <i>FAM90A20P</i>  | 1.13 | 0.03  | <i>GREM2</i>       | 1.17 | 0.03  |
|  | <i>FBXL22</i>     | 1.13 | <0.01 | <i>GRIFIN</i>      | 1.19 | 0.02  |
|  | <i>FBXO5</i>      | 0.66 | 0.01  | <i>GRIK1</i>       | 0.83 | 0.02  |
|  | <i>FCN2</i>       | 0.61 | 0.03  | <i>GRIN2C</i>      | 1.10 | <0.05 |
|  | <i>FGD3</i>       | 1.37 | 0.04  | <i>GRM3</i>        | 1.03 | 0.01  |
|  | <i>FGD5P1</i>     | 0.81 | 0.01  | <i>GRM8</i>        | 0.85 | 0.04  |
|  | <i>FLJ13224</i>   | 0.86 | 0.02  | <i>GSTT4</i>       | 0.72 | <0.01 |
|  | <i>FLJ16171</i>   | 1.20 | 0.02  | <i>GTSE1-DT</i>    | 1.12 | <0.01 |
|  | <i>FLJ31183</i>   | 1.19 | 0.03  | <i>GUCA1C</i>      | 0.90 | 0.03  |
|  | <i>FOXD4L5</i>    | 1.24 | <0.01 | <i>GUCA2B</i>      | 1.13 | <0.05 |
|  | <i>FRG1</i>       | 0.88 | 0.02  | <i>H4C4</i>        | 0.66 | 0.02  |
|  | <i>FRRS1L</i>     | 0.88 | 0.04  | <i>HBM</i>         | 1.13 | 0.02  |
|  | <i>FUT7</i>       | 1.29 | 0.01  | <i>HCG26</i>       | 1.18 | <0.01 |
|  | <i>GABRQ</i>      | 0.78 | 0.04  | <i>HCG9</i>        | 1.14 | 0.02  |
|  | <i>GAS2LIP2</i>   | 1.28 | <0.01 | <i>HEPN1</i>       | 1.18 | <0.01 |
|  | <i>GASK1A</i>     | 1.21 | 0.03  | <i>HEXD-IT1</i>    | 0.79 | 0.04  |
|  | <i>GDF7</i>       | 1.23 | 0.02  | <i>HINT1</i>       | 0.76 | 0.01  |
|  | <i>GMIP</i>       | 1.18 | 0.04  | <i>HLA-DQB2</i>    | 1.09 | <0.01 |
|  | <i>GOLGA8IP</i>   | 1.20 | 0.04  | <i>HLA-F-AS1</i>   | 0.75 | 0.03  |
|  | <i>GPA33</i>      | 1.21 | 0.03  | <i>HTR1F</i>       | 1.31 | <0.05 |
|  | <i>GPATCH4</i>    | 0.69 | 0.03  | <i>IDO1</i>        | 0.81 | 0.04  |
|  | <i>GPR158-AS1</i> | 0.78 | <0.01 | <i>IFNA7</i>       | 1.42 | 0.02  |
|  | <i>GSTA3</i>      | 1.36 | 0.02  | <i>IFNA8</i>       | 1.24 | 0.02  |
|  | <i>GTF2F1</i>     | 0.85 | 0.03  | <i>IGHV1OR15-9</i> | 1.33 | 0.04  |
|  | <i>GTF2IRD2B</i>  | 1.18 | 0.01  | <i>IGHV3-35</i>    | 1.31 | 0.03  |
|  | <i>H1-2</i>       | 0.68 | 0.03  | <i>IGLJ2</i>       | 1.18 | <0.05 |
|  | <i>H2AC1</i>      | 1.42 | 0.04  | <i>IGLV7-43</i>    | 0.67 | 0.02  |
|  | <i>H2AC13</i>     | 0.53 | 0.02  | <i>IMPG1</i>       | 0.84 | <0.01 |
|  | <i>H2AC16</i>     | 0.74 | <0.05 | <i>INPP5J</i>      | 0.80 | 0.03  |
|  | <i>H2AC17</i>     | 0.52 | 0.02  | <i>ISLR</i>        | 1.19 | <0.01 |
|  | <i>H2AC4</i>      | 0.77 | <0.05 | <i>ITIH1</i>       | 0.70 | 0.02  |
|  | <i>H2BC10</i>     | 0.61 | 0.04  | <i>ITIH2</i>       | 0.78 | 0.02  |

|  |                    |      |       |                   |      |       |
|--|--------------------|------|-------|-------------------|------|-------|
|  | <i>HIST1H2BK</i>   | 0.65 | 0.04  | <i>KCNK9</i>      | 1.31 | 0.04  |
|  | <i>H2BC13</i>      | 0.60 | 0.01  | <i>KCNMB2</i>     | 0.80 | 0.01  |
|  | <i>H3C11</i>       | 0.59 | 0.02  | <i>KLF16</i>      | 0.83 | <0.05 |
|  | <i>H3C15</i>       | 0.61 | <0.05 | <i>KLHL31</i>     | 1.41 | 0.02  |
|  | <i>H3C4</i>        | 0.78 | <0.05 | <i>KRT32</i>      | 1.06 | 0.02  |
|  | <i>H3C7</i>        | 0.63 | 0.03  | <i>KRT40</i>      | 0.85 | 0.03  |
|  | <i>H4C12</i>       | 0.73 | 0.01  | <i>KRT79</i>      | 1.28 | 0.01  |
|  | <i>HASPIN</i>      | 0.77 | 0.04  | <i>KRT9</i>       | 1.32 | 0.02  |
|  | <i>HEPACAM2</i>    | 0.88 | 0.03  | <i>KRTAP11-1</i>  | 1.12 | 0.04  |
|  | <i>HMCN2</i>       | 1.10 | 0.02  | <i>KRTAP15-1</i>  | 0.81 | <0.05 |
|  | <i>HORMAD2-AS1</i> | 0.78 | <0.05 | <i>KRTAP19-7</i>  | 1.21 | 0.04  |
|  | <i>HSD11B1</i>     | 1.06 | 0.02  | <i>KRTAP21-2</i>  | 0.84 | 0.01  |
|  | <i>HSP90B3P</i>    | 0.73 | 0.01  | <i>KRTAP4-11</i>  | 0.63 | 0.02  |
|  | <i>HSPBP1</i>      | 0.74 | 0.01  | <i>L3MBTL2</i>    | 0.84 | 0.03  |
|  | <i>HTR5A-AS1</i>   | 0.85 | <0.05 | <i>LAGE3</i>      | 0.83 | <0.01 |
|  | <i>IGF1</i>        | 0.91 | 0.04  | <i>LAMA5-AS1</i>  | 1.20 | 0.02  |
|  | <i>IGFALS</i>      | 1.11 | 0.04  | <i>LANCL1-AS1</i> | 0.77 | 0.01  |
|  | <i>IL36A</i>       | 0.76 | 0.03  | <i>LARP7</i>      | 0.90 | <0.05 |
|  | <i>INTS4P2</i>     | 0.82 | 0.02  | <i>LCE1A</i>      | 0.68 | 0.02  |
|  | <i>IRAG1-AS1</i>   | 1.25 | 0.01  | <i>LCE1B</i>      | 1.25 | <0.01 |
|  | <i>KATNBL1P6</i>   | 0.76 | 0.02  | <i>LCE3A</i>      | 1.20 | 0.04  |
|  | <i>KCNH6</i>       | 1.31 | 0.04  | <i>LCE3C</i>      | 0.74 | 0.01  |
|  | <i>KCTD2</i>       | 0.90 | 0.04  | <i>LCN9</i>       | 0.72 | 0.02  |
|  | <i>KIF15</i>       | 0.77 | 0.02  | <i>LCTL</i>       | 0.82 | 0.04  |
|  | <i>KIF18A</i>      | 0.79 | 0.04  | <i>LEMD1-AS1</i>  | 0.75 | 0.01  |
|  | <i>KIR2DS2</i>     | 0.62 | 0.01  | <i>LGALS2</i>     | 1.22 | 0.04  |
|  | <i>KIR2DS3</i>     | 0.86 | 0.01  | <i>LHFPL7</i>     | 1.23 | <0.01 |
|  | <i>KLF17</i>       | 0.81 | 0.02  | <i>LILRA3</i>     | 1.14 | 0.01  |
|  | <i>KLHDC8A</i>     | 1.30 | 0.04  | <i>LIN7A</i>      | 1.23 | 0.04  |
|  | <i>KNG1</i>        | 1.29 | 0.03  | <i>LINC00307</i>  | 0.82 | 0.01  |
|  | <i>KRTAP24-1</i>   | 0.91 | 0.04  | <i>LINC00400</i>  | 0.91 | 0.04  |
|  | <i>KRTAP29-1</i>   | 0.81 | 0.01  | <i>LINC00485</i>  | 0.78 | 0.01  |
|  | <i>KRTAP4-3</i>    | 1.39 | 0.01  | <i>LINC00544</i>  | 0.84 | 0.03  |
|  | <i>KRTAP4-5</i>    | 0.83 | <0.05 | <i>LINC00566</i>  | 1.14 | 0.04  |
|  | <i>LAG3</i>        | 0.88 | 0.04  | <i>LINC00570</i>  | 0.87 | 0.03  |
|  | <i>LBP</i>         | 0.79 | 0.03  | <i>LINC00595</i>  | 0.80 | 0.03  |
|  | <i>LCE3B</i>       | 1.19 | 0.01  | <i>LINC00706</i>  | 0.54 | 0.03  |
|  | <i>LDB2</i>        | 1.27 | 0.03  | <i>LINC00927</i>  | 1.09 | 0.02  |
|  | <i>LEO1</i>        | 0.85 | 0.02  | <i>LINC00933</i>  | 1.32 | 0.01  |

|  |                     |      |       |                     |      |       |
|--|---------------------|------|-------|---------------------|------|-------|
|  | <i>LINC00276</i>    | 1.25 | 0.01  | <i>LINC01081</i>    | 0.87 | 0.04  |
|  | <i>LINC00304</i>    | 1.46 | 0.02  | <i>LINC01114</i>    | 1.31 | 0.01  |
|  | <i>LINC00385</i>    | 0.91 | 0.02  | <i>LINC01151</i>    | 1.25 | <0.05 |
|  | <i>LINC00398</i>    | 1.29 | 0.01  | <i>LINC01251</i>    | 1.28 | 0.02  |
|  | <i>LINC00502</i>    | 1.08 | 0.04  | <i>LINC01276</i>    | 0.89 | 0.04  |
|  | <i>LINC00523</i>    | 1.15 | 0.03  | <i>LINC01364</i>    | 1.28 | 0.03  |
|  | <i>LINC00609</i>    | 0.93 | 0.03  | <i>LINC01423</i>    | 1.21 | 0.03  |
|  | <i>LINC00905</i>    | 0.84 | 0.02  | <i>LINC01451</i>    | 0.94 | 0.02  |
|  | <i>LINC00974</i>    | 1.25 | 0.03  | <i>LINC01467</i>    | 0.83 | 0.04  |
|  | <i>LINC01078</i>    | 0.88 | 0.04  | <i>LINC01475</i>    | 1.27 | <0.05 |
|  | <i>LINC01088</i>    | 1.20 | 0.03  | <i>LINC01496</i>    | 0.86 | 0.03  |
|  | <i>LINC01115</i>    | 0.91 | 0.04  | <i>LINC01546</i>    | 1.67 | <0.05 |
|  | <i>LINC01237</i>    | 1.12 | 0.01  | <i>LINC01566</i>    | 1.35 | 0.01  |
|  | <i>LINC01335</i>    | 1.12 | 0.02  | <i>LINC01579</i>    | 1.12 | 0.03  |
|  | <i>LINC01340</i>    | 1.15 | 0.01  | <i>LINC01618</i>    | 0.87 | 0.02  |
|  | <i>LINC01493</i>    | 0.86 | 0.04  | <i>LINC01869</i>    | 0.94 | <0.05 |
|  | <i>LINC01517</i>    | 0.87 | 0.03  | <i>LINC02209</i>    | 1.26 | <0.01 |
|  | <i>LINC01816</i>    | 0.83 | 0.03  | <i>LINC02587</i>    | 0.84 | 0.04  |
|  | <i>LINC02872</i>    | 1.22 | 0.02  | <i>LINC02694</i>    | 1.23 | <0.01 |
|  | <i>LINC02907</i>    | 1.15 | 0.03  | <i>LOC100130458</i> | 1.19 | <0.05 |
|  | <i>LIPI</i>         | 0.84 | 0.04  | <i>LOC100505622</i> | 0.87 | 0.01  |
|  | <i>LNPEP</i>        | 1.18 | 0.03  | <i>LOC100505685</i> | 1.13 | 0.03  |
|  | <i>LOC100101148</i> | 0.80 | 0.04  | <i>LOC100506725</i> | 1.19 | 0.04  |
|  | <i>LOC100128437</i> | 1.34 | 0.01  | <i>LOC100506985</i> | 1.13 | <0.01 |
|  | <i>LOC100128573</i> | 1.23 | 0.04  | <i>LOC100996637</i> | 0.73 | 0.03  |
|  | <i>LOC100129434</i> | 1.27 | 0.04  | <i>LOC101060385</i> | 0.88 | 0.02  |
|  | <i>LOC100129596</i> | 0.86 | 0.02  | <i>LOC101927059</i> | 1.27 | <0.05 |
|  | <i>LOC100130507</i> | 0.80 | 0.03  | <i>LOC101927082</i> | 1.12 | 0.03  |
|  | <i>LOC100133106</i> | 0.84 | 0.04  | <i>LOC101927120</i> | 1.25 | 0.01  |
|  | <i>LOC100288570</i> | 1.06 | 0.04  | <i>LOC101927153</i> | 0.80 | 0.04  |
|  | <i>LOC100506489</i> | 1.27 | 0.01  | <i>LOC101927365</i> | 0.82 | <0.05 |
|  | <i>LOC100506928</i> | 1.09 | 0.03  | <i>LOC101927412</i> | 1.33 | 0.02  |
|  | <i>LOC100507661</i> | 0.84 | <0.05 | <i>LOC101927434</i> | 0.79 | 0.04  |
|  | <i>LOC100652871</i> | 1.24 | <0.01 | <i>LOC101927435</i> | 0.87 | 0.02  |
|  | <i>LOC100653233</i> | 1.21 | 0.04  | <i>LOC101927468</i> | 0.60 | 0.01  |
|  | <i>LOC100996419</i> | 1.34 | 0.02  | <i>LOC101927505</i> | 1.26 | 0.02  |
|  | <i>LOC100996630</i> | 1.27 | 0.04  | <i>LOC101927664</i> | 0.85 | 0.01  |
|  | <i>LOC101060391</i> | 0.80 | 0.01  | <i>LOC101927721</i> | 1.22 | 0.04  |
|  | <i>LOC101926948</i> | 1.12 | 0.04  | <i>LOC101927766</i> | 0.77 | 0.02  |

|                     |      |       |                     |      |       |
|---------------------|------|-------|---------------------|------|-------|
| <i>LOC101927023</i> | 1.44 | <0.01 | <i>LOC101927853</i> | 1.30 | 0.03  |
| <i>LOC101927346</i> | 0.72 | 0.02  | <i>LOC101928058</i> | 1.16 | 0.03  |
| <i>LOC101927378</i> | 1.15 | 0.02  | <i>LOC101928077</i> | 0.93 | <0.05 |
| <i>LOC101927467</i> | 0.83 | 0.02  | <i>LOC101928161</i> | 1.14 | <0.05 |
| <i>LOC101927502</i> | 1.31 | <0.05 | <i>LOC101928174</i> | 1.26 | 0.03  |
| <i>LOC101927635</i> | 0.85 | 0.01  | <i>LOC101928177</i> | 0.70 | 0.02  |
| <i>LOC101927694</i> | 1.16 | 0.02  | <i>LOC101928253</i> | 1.24 | 0.04  |
| <i>LOC101927768</i> | 0.93 | <0.05 | <i>LOC101928306</i> | 0.67 | 0.03  |
| <i>LOC101927769</i> | 1.22 | <0.05 | <i>LOC101928404</i> | 0.72 | <0.05 |
| <i>LOC101927798</i> | 0.80 | 0.01  | <i>LOC101928409</i> | 0.88 | 0.02  |
| <i>LOC101927851</i> | 1.22 | 0.04  | <i>LOC101928418</i> | 1.38 | 0.04  |
| <i>LOC101927972</i> | 0.79 | 0.04  | <i>LOC101928561</i> | 1.24 | 0.02  |
| <i>LOC101928092</i> | 1.47 | 0.04  | <i>LOC101928595</i> | 1.28 | 0.03  |
| <i>LOC101928111</i> | 1.40 | 0.01  | <i>LOC101929058</i> | 0.77 | 0.03  |
| <i>LOC101928188</i> | 1.70 | 0.04  | <i>LOC101929084</i> | 1.11 | 0.03  |
| <i>LOC101928439</i> | 0.85 | <0.05 | <i>LOC101929485</i> | 1.14 | <0.05 |
| <i>LOC101928472</i> | 0.76 | 0.01  | <i>LOC101929526</i> | 1.52 | 0.01  |
| <i>LOC101928711</i> | 0.93 | 0.02  | <i>LOC101929538</i> | 1.20 | <0.05 |
| <i>LOC101928721</i> | 1.20 | <0.05 | <i>LOC101929563</i> | 1.12 | 0.01  |
| <i>LOC101928841</i> | 1.15 | 0.04  | <i>LOC101930114</i> | 1.14 | <0.05 |
| <i>LOC101928877</i> | 1.14 | 0.04  | <i>LOC102467216</i> | 0.80 | 0.01  |
| <i>LOC101928896</i> | 0.90 | 0.03  | <i>LOC102477328</i> | 0.78 | 0.03  |
| <i>LOC101929140</i> | 1.62 | 0.03  | <i>LOC102723418</i> | 0.87 | 0.04  |
| <i>LOC101929153</i> | 1.24 | <0.01 | <i>LOC102723640</i> | 1.14 | <0.05 |
| <i>LOC101929432</i> | 1.09 | 0.03  | <i>LOC102723757</i> | 0.90 | 0.03  |
| <i>LOC101929445</i> | 1.33 | 0.03  | <i>LOC102724247</i> | 0.83 | 0.04  |
| <i>LOC101929657</i> | 1.18 | 0.02  | <i>LOC102724380</i> | 0.68 | 0.01  |
| <i>LOC101929697</i> | 0.87 | 0.04  | <i>LOC102724443</i> | 0.89 | <0.01 |
| <i>LOC101929723</i> | 1.47 | 0.03  | <i>LOC102724465</i> | 0.87 | 0.02  |
| <i>LOC102723313</i> | 1.25 | 0.01  | <i>LOC105369391</i> | 1.17 | 0.01  |
| <i>LOC102723714</i> | 1.42 | 0.04  | <i>LOC105369406</i> | 0.83 | 0.01  |
| <i>LOC102724509</i> | 0.81 | 0.01  | <i>LOC105369413</i> | 1.12 | <0.01 |
| <i>LOC102724670</i> | 0.82 | 0.01  | <i>LOC105369527</i> | 1.29 | 0.03  |
| <i>LOC102724698</i> | 1.43 | 0.03  | <i>LOC105369541</i> | 1.19 | 0.02  |
| <i>LOC102724861</i> | 1.21 | 0.01  | <i>LOC105369639</i> | 1.22 | 0.02  |
| <i>LOC102725072</i> | 1.58 | 0.04  | <i>LOC105369893</i> | 0.79 | 0.02  |
| <i>LOC105369361</i> | 0.82 | 0.01  | <i>LOC105370039</i> | 0.90 | 0.03  |
| <i>LOC105369539</i> | 1.30 | <0.05 | <i>LOC105370120</i> | 1.12 | 0.04  |
| <i>LOC105369549</i> | 0.94 | 0.03  | <i>LOC105370149</i> | 0.82 | 0.04  |

|  |                     |      |       |                     |      |       |
|--|---------------------|------|-------|---------------------|------|-------|
|  | <i>LOC105369859</i> | 0.94 | 0.04  | <i>LOC105370186</i> | 0.80 | 0.02  |
|  | <i>LOC105369926</i> | 0.81 | 0.04  | <i>LOC105370232</i> | 1.22 | 0.02  |
|  | <i>LOC105369971</i> | 0.93 | 0.04  | <i>LOC105370344</i> | 1.14 | <0.05 |
|  | <i>LOC105369984</i> | 0.82 | 0.03  | <i>LOC105370456</i> | 0.83 | 0.01  |
|  | <i>LOC105370058</i> | 0.78 | <0.01 | <i>LOC105370492</i> | 1.23 | <0.01 |
|  | <i>LOC105370088</i> | 1.24 | 0.04  | <i>LOC105370539</i> | 0.80 | 0.01  |
|  | <i>LOC105370129</i> | 1.19 | 0.04  | <i>LOC105370560</i> | 0.79 | <0.05 |
|  | <i>LOC105370230</i> | 1.34 | 0.02  | <i>LOC105370616</i> | 1.27 | <0.01 |
|  | <i>LOC105370319</i> | 0.82 | 0.03  | <i>LOC105370767</i> | 1.26 | 0.03  |
|  | <i>LOC105370370</i> | 0.91 | 0.03  | <i>LOC105371195</i> | 1.26 | 0.02  |
|  | <i>LOC105370415</i> | 1.18 | <0.01 | <i>LOC105371301</i> | 0.74 | <0.05 |
|  | <i>LOC105370632</i> | 0.78 | 0.03  | <i>LOC105371357</i> | 1.27 | 0.01  |
|  | <i>LOC105370745</i> | 0.74 | 0.02  | <i>LOC105371541</i> | 0.90 | 0.04  |
|  | <i>LOC105370781</i> | 1.10 | <0.01 | <i>LOC105371560</i> | 1.11 | <0.05 |
|  | <i>LOC105370962</i> | 1.18 | <0.05 | <i>LOC105371600</i> | 1.29 | 0.03  |
|  | <i>LOC105371317</i> | 0.84 | 0.03  | <i>LOC105371750</i> | 1.15 | 0.03  |
|  | <i>LOC105371379</i> | 1.10 | <0.01 | <i>LOC105371760</i> | 1.22 | 0.01  |
|  | <i>LOC105371528</i> | 1.21 | 0.02  | <i>LOC105371976</i> | 1.16 | 0.01  |
|  | <i>LOC105371784</i> | 0.83 | 0.02  | <i>LOC105371979</i> | 1.17 | <0.05 |
|  | <i>LOC105371824</i> | 1.13 | 0.04  | <i>LOC105372132</i> | 1.48 | 0.02  |
|  | <i>LOC105371974</i> | 1.42 | 0.02  | <i>LOC105372155</i> | 1.17 | 0.03  |
|  | <i>LOC105372009</i> | 1.16 | <0.05 | <i>LOC105372258</i> | 1.17 | 0.01  |
|  | <i>LOC105372202</i> | 1.14 | <0.01 | <i>LOC105372330</i> | 0.75 | <0.01 |
|  | <i>LOC105372430</i> | 1.25 | 0.02  | <i>LOC105372569</i> | 1.15 | 0.04  |
|  | <i>LOC105372587</i> | 1.38 | 0.04  | <i>LOC105372596</i> | 0.83 | <0.01 |
|  | <i>LOC105372598</i> | 1.31 | <0.05 | <i>LOC105372929</i> | 0.69 | 0.03  |
|  | <i>LOC105372649</i> | 1.19 | 0.04  | <i>LOC105373180</i> | 1.15 | 0.03  |
|  | <i>LOC105372676</i> | 0.85 | 0.01  | <i>LOC105373218</i> | 0.85 | 0.04  |
|  | <i>LOC105372763</i> | 1.12 | <0.01 | <i>LOC105373249</i> | 1.13 | 0.02  |
|  | <i>LOC105372876</i> | 0.73 | 0.01  | <i>LOC105373400</i> | 0.87 | 0.02  |
|  | <i>LOC105372999</i> | 1.06 | 0.02  | <i>LOC105373508</i> | 1.21 | 0.04  |
|  | <i>LOC105373011</i> | 1.44 | 0.02  | <i>LOC105373522</i> | 1.26 | <0.01 |
|  | <i>LOC105373082</i> | 1.19 | 0.01  | <i>LOC105373530</i> | 0.77 | 0.03  |
|  | <i>LOC105373175</i> | 0.88 | 0.02  | <i>LOC105373585</i> | 1.04 | <0.05 |
|  | <i>LOC105373484</i> | 0.85 | <0.05 | <i>LOC105373615</i> | 1.22 | 0.04  |
|  | <i>LOC105373502</i> | 1.09 | 0.04  | <i>LOC105373617</i> | 0.84 | 0.01  |
|  | <i>LOC105373586</i> | 1.29 | 0.01  | <i>LOC105373784</i> | 0.91 | 0.03  |
|  | <i>LOC105373597</i> | 1.12 | 0.04  | <i>LOC105373789</i> | 0.84 | 0.03  |
|  | <i>LOC105373772</i> | 0.70 | 0.01  | <i>LOC105373899</i> | 1.12 | 0.03  |

|  |                     |      |       |                     |      |       |
|--|---------------------|------|-------|---------------------|------|-------|
|  | <i>LOC105374005</i> | 1.14 | 0.02  | <i>LOC105374229</i> | 0.69 | 0.03  |
|  | <i>LOC105374024</i> | 0.80 | 0.03  | <i>LOC105374265</i> | 0.78 | 0.03  |
|  | <i>LOC105374201</i> | 1.17 | <0.05 | <i>LOC105374546</i> | 1.17 | 0.02  |
|  | <i>LOC105374325</i> | 0.75 | 0.01  | <i>LOC105374617</i> | 0.89 | 0.03  |
|  | <i>LOC105374623</i> | 0.90 | 0.02  | <i>LOC105374643</i> | 1.19 | <0.05 |
|  | <i>LOC105374763</i> | 0.87 | <0.05 | <i>LOC105374644</i> | 1.10 | <0.05 |
|  | <i>LOC105374793</i> | 0.79 | <0.01 | <i>LOC105374645</i> | 1.23 | 0.02  |
|  | <i>LOC105375287</i> | 0.80 | 0.01  | <i>LOC105374728</i> | 1.25 | 0.01  |
|  | <i>LOC105375341</i> | 0.78 | 0.02  | <i>LOC105374729</i> | 1.14 | 0.01  |
|  | <i>LOC105375429</i> | 1.31 | 0.03  | <i>LOC105374753</i> | 1.11 | <0.01 |
|  | <i>LOC105375523</i> | 1.21 | 0.04  | <i>LOC105374843</i> | 1.22 | 0.04  |
|  | <i>LOC105375635</i> | 0.82 | <0.05 | <i>LOC105374905</i> | 0.81 | 0.03  |
|  | <i>LOC105375666</i> | 1.45 | 0.01  | <i>LOC105375132</i> | 0.86 | 0.04  |
|  | <i>LOC105375847</i> | 1.23 | 0.02  | <i>LOC105375152</i> | 0.77 | 0.01  |
|  | <i>LOC105375937</i> | 1.15 | 0.01  | <i>LOC105375224</i> | 0.70 | 0.04  |
|  | <i>LOC105376130</i> | 0.88 | 0.02  | <i>LOC105375547</i> | 0.79 | 0.03  |
|  | <i>LOC105376412</i> | 0.85 | 0.01  | <i>LOC105375589</i> | 1.11 | 0.03  |
|  | <i>LOC105376605</i> | 0.78 | 0.04  | <i>LOC105375710</i> | 1.11 | 0.04  |
|  | <i>LOC105376653</i> | 1.13 | <0.05 | <i>LOC105375861</i> | 1.20 | 0.01  |
|  | <i>LOC105376706</i> | 1.17 | 0.01  | <i>LOC105376020</i> | 0.86 | <0.05 |
|  | <i>LOC105376789</i> | 0.87 | 0.03  | <i>LOC105376043</i> | 1.17 | 0.04  |
|  | <i>LOC105376975</i> | 0.78 | 0.02  | <i>LOC105376063</i> | 1.15 | 0.03  |
|  | <i>LOC105377026</i> | 1.08 | 0.02  | <i>LOC105376101</i> | 0.85 | 0.04  |
|  | <i>LOC105377061</i> | 0.73 | 0.03  | <i>LOC105376685</i> | 1.22 | 0.01  |
|  | <i>LOC105377105</i> | 0.76 | 0.02  | <i>LOC105376928</i> | 1.37 | 0.04  |
|  | <i>LOC105377295</i> | 1.32 | <0.05 | <i>LOC105377003</i> | 1.22 | <0.01 |
|  | <i>LOC105377473</i> | 1.14 | 0.01  | <i>LOC105377041</i> | 0.67 | 0.01  |
|  | <i>LOC105378047</i> | 1.21 | <0.01 | <i>LOC105377115</i> | 0.91 | 0.02  |
|  | <i>LOC105378280</i> | 1.11 | 0.01  | <i>LOC105377127</i> | 1.14 | 0.04  |
|  | <i>LOC105378516</i> | 1.24 | 0.02  | <i>LOC105377145</i> | 0.89 | <0.01 |
|  | <i>LOC105378641</i> | 1.15 | 0.04  | <i>LOC105377153</i> | 0.81 | 0.03  |
|  | <i>LOC105378654</i> | 0.92 | 0.04  | <i>LOC105377303</i> | 1.17 | 0.04  |
|  | <i>LOC105378702</i> | 1.34 | 0.01  | <i>LOC105377505</i> | 0.83 | 0.01  |
|  | <i>LOC105378706</i> | 1.23 | 0.03  | <i>LOC105377742</i> | 0.84 | <0.05 |
|  | <i>LOC105378738</i> | 0.80 | 0.04  | <i>LOC105377755</i> | 0.83 | 0.04  |
|  | <i>LOC105378769</i> | 1.23 | <0.05 | <i>LOC105377774</i> | 1.19 | 0.04  |
|  | <i>LOC105378839</i> | 0.77 | 0.04  | <i>LOC105378309</i> | 0.89 | <0.05 |
|  | <i>LOC105379091</i> | 1.27 | 0.03  | <i>LOC105378334</i> | 1.11 | <0.01 |
|  | <i>LOC105379592</i> | 1.28 | 0.02  | <i>LOC105378564</i> | 1.12 | 0.01  |

|  |                     |      |       |                     |      |       |
|--|---------------------|------|-------|---------------------|------|-------|
|  | <i>LOC105379881</i> | 1.32 | <0.01 | <i>LOC105378612</i> | 0.92 | 0.04  |
|  | <i>LOC153910</i>    | 0.67 | 0.01  | <i>LOC105378618</i> | 1.12 | 0.04  |
|  | <i>LOC255654</i>    | 1.25 | 0.02  | <i>LOC105378727</i> | 1.11 | <0.01 |
|  | <i>LOC339975</i>    | 1.19 | 0.03  | <i>LOC105378784</i> | 0.91 | 0.04  |
|  | <i>LOC400620</i>    | 1.08 | 0.03  | <i>LOC105378997</i> | 1.10 | 0.01  |
|  | <i>LOC400800</i>    | 1.26 | 0.02  | <i>LOC105379175</i> | 0.74 | 0.04  |
|  | <i>LOC643802</i>    | 1.31 | 0.01  | <i>LOC105379379</i> | 1.25 | 0.02  |
|  | <i>LOC729461</i>    | 0.73 | <0.05 | <i>LOC105755953</i> | 0.76 | 0.03  |
|  | <i>LRIT3</i>        | 0.80 | 0.04  | <i>LOC149950</i>    | 1.17 | 0.03  |
|  | <i>LRP4-AS1</i>     | 0.80 | <0.05 | <i>LOC339902</i>    | 0.82 | <0.05 |
|  | <i>LRRC15</i>       | 1.32 | 0.03  | <i>LOC401176</i>    | 0.73 | 0.03  |
|  | <i>LRRC30</i>       | 1.20 | 0.02  | <i>LOC440602</i>    | 0.84 | 0.04  |
|  | <i>LRRC40</i>       | 0.91 | 0.04  | <i>LOC494141</i>    | 0.89 | 0.03  |
|  | <i>LUC7L3</i>       | 1.26 | 0.02  | <i>LOC642574</i>    | 1.14 | 0.04  |
|  | <i>MAP3K15</i>      | 0.91 | 0.01  | <i>LOC643441</i>    | 1.09 | 0.02  |
|  | <i>MAP4K1</i>       | 0.82 | 0.04  | <i>LOC650293</i>    | 0.75 | 0.04  |
|  | <i>MCM10</i>        | 0.69 | 0.03  | <i>LRRC32</i>       | 1.46 | 0.04  |
|  | <i>MEG3</i>         | 0.82 | 0.02  | <i>LUNAR1</i>       | 0.77 | 0.04  |
|  | <i>MEP1A</i>        | 0.67 | 0.01  | <i>LYZL6</i>        | 0.79 | 0.02  |
|  | <i>MIB1</i>         | 1.15 | <0.05 | <i>MAGEB6</i>       | 0.72 | 0.01  |
|  | <i>MIR1237</i>      | 0.64 | 0.04  | <i>MAPT-AS1</i>     | 1.28 | <0.05 |
|  | <i>MIR1269A</i>     | 0.83 | 0.04  | <i>MCPHI-AS1</i>    | 1.17 | 0.01  |
|  | <i>MIR2115</i>      | 1.23 | <0.01 | <i>ME3</i>          | 1.10 | <0.01 |
|  | <i>MIR217HG</i>     | 1.15 | 0.02  | <i>MIR103B1</i>     | 0.90 | 0.03  |
|  | <i>MIR26B</i>       | 1.28 | 0.04  | <i>MIR103B2</i>     | 0.70 | 0.03  |
|  | <i>MIR3119-2</i>    | 0.86 | 0.04  | <i>MIR105-1</i>     | 0.89 | 0.02  |
|  | <i>MIR3120</i>      | 0.77 | 0.01  | <i>MIR106A</i>      | 0.89 | <0.05 |
|  | <i>MIR3129</i>      | 0.82 | 0.03  | <i>MIR1283-1</i>    | 0.75 | 0.02  |
|  | <i>MIR3173</i>      | 1.11 | 0.02  | <i>MIR146A</i>      | 1.10 | 0.04  |
|  | <i>MIR324</i>       | 0.88 | <0.01 | <i>MIR2052HG</i>    | 0.84 | 0.01  |
|  | <i>MIR3671</i>      | 1.89 | 0.04  | <i>MIR2053</i>      | 0.82 | 0.02  |
|  | <i>MIR3915</i>      | 0.81 | 0.04  | <i>MIR3150A</i>     | 1.16 | 0.04  |
|  | <i>MIR3922</i>      | 1.23 | 0.04  | <i>MIR3156-1</i>    | 0.81 | 0.01  |
|  | <i>MIR4266</i>      | 0.47 | 0.03  | <i>MIR3158-1</i>    | 0.77 | <0.05 |
|  | <i>MIR4276</i>      | 0.73 | 0.03  | <i>MIR3198-1</i>    | 0.80 | 0.01  |
|  | <i>MIR4294</i>      | 1.25 | 0.01  | <i>MIR320C2</i>     | 1.51 | 0.02  |
|  | <i>MIR4487</i>      | 0.78 | 0.04  | <i>MIR342</i>       | 1.13 | 0.03  |
|  | <i>MIR4645</i>      | 1.36 | 0.02  | <i>MIR3659</i>      | 0.91 | 0.04  |
|  | <i>MIR4797</i>      | 1.26 | 0.04  | <i>MIR3910-1</i>    | 0.91 | 0.03  |

|                  |      |       |                  |      |       |
|------------------|------|-------|------------------|------|-------|
| <i>MIR499A</i>   | 1.32 | 0.03  | <i>MIR4279</i>   | 0.54 | 0.03  |
| <i>MIR507</i>    | 1.28 | 0.03  | <i>MIR4301</i>   | 1.23 | 0.04  |
| <i>MIR516B2</i>  | 0.53 | 0.04  | <i>MIR432</i>    | 1.34 | 0.01  |
| <i>MIR519C</i>   | 0.95 | 0.02  | <i>MIR4476</i>   | 1.14 | 0.04  |
| <i>MIR548W</i>   | 0.83 | <0.05 | <i>MIR4477A</i>  | 1.15 | <0.05 |
| <i>MIR550B2</i>  | 1.43 | 0.04  | <i>MIR4483</i>   | 1.20 | 0.03  |
| <i>MIR551B</i>   | 1.17 | 0.04  | <i>MIR4499</i>   | 0.64 | <0.05 |
| <i>MIR670</i>    | 1.39 | 0.03  | <i>MIR4662A</i>  | 0.86 | 0.02  |
| <i>MIR767</i>    | 0.84 | 0.01  | <i>MIR497HG</i>  | 0.75 | 0.03  |
| <i>MIR92B</i>    | 0.78 | <0.05 | <i>MIR498</i>    | 1.15 | 0.04  |
| <i>MIR934</i>    | 0.86 | 0.01  | <i>MIR513B</i>   | 0.77 | 0.03  |
| <i>MIRLET7A2</i> | 1.35 | 0.04  | <i>MIR516B1</i>  | 0.75 | 0.02  |
| <i>MPC1L</i>     | 0.83 | 0.04  | <i>MIR520A</i>   | 1.48 | <0.05 |
| <i>MPLKIP</i>    | 1.20 | <0.05 | <i>MIR527</i>    | 1.60 | 0.03  |
| <i>MRLN</i>      | 1.19 | 0.01  | <i>MIR548T</i>   | 2.11 | 0.02  |
| <i>MRPL12</i>    | 0.75 | 0.02  | <i>MIR7-3</i>    | 1.10 | 0.02  |
| <i>MRPS7</i>     | 0.78 | 0.03  | <i>MIXL1</i>     | 1.20 | <0.01 |
| <i>MS4A12</i>    | 1.19 | 0.03  | <i>MLH1</i>      | 0.83 | 0.04  |
| <i>MSH6</i>      | 0.94 | 0.04  | <i>MLIP-IT1</i>  | 1.18 | 0.04  |
| <i>MST1</i>      | 1.40 | 0.01  | <i>MPP7</i>      | 1.23 | 0.04  |
| <i>MTBP</i>      | 0.84 | 0.01  | <i>MRGPRX2</i>   | 0.78 | 0.04  |
| <i>MTRNR2L6</i>  | 1.25 | 0.03  | <i>MRM1</i>      | 0.80 | 0.02  |
| <i>NAPSB</i>     | 0.80 | 0.02  | <i>MROH9</i>     | 1.20 | 0.04  |
| <i>NCL</i>       | 0.82 | 0.02  | <i>MRPL19</i>    | 0.87 | 0.04  |
| <i>NEGR1-IT1</i> | 0.85 | 0.02  | <i>MS4A15</i>    | 1.19 | 0.03  |
| <i>NGRN</i>      | 0.84 | 0.04  | <i>MTA2</i>      | 0.86 | 0.04  |
| <i>NID2</i>      | 1.22 | <0.05 | <i>MTUS2-AS1</i> | 1.21 | 0.04  |
| <i>NKX6-1</i>    | 1.25 | <0.05 | <i>MUC19</i>     | 1.14 | 0.03  |
| <i>NNT-AS1</i>   | 1.16 | 0.04  | <i>MUC6</i>      | 1.10 | 0.04  |
| <i>NOL11</i>     | 0.74 | <0.05 | <i>NCF1C</i>     | 0.77 | 0.01  |
| <i>NPAP1</i>     | 1.25 | 0.03  | <i>NEIL2</i>     | 0.90 | 0.04  |
| <i>NPB</i>       | 0.76 | 0.01  | <i>NEXN-AS1</i>  | 1.16 | <0.05 |
| <i>NR2F2</i>     | 0.73 | 0.01  | <i>NFAM1</i>     | 0.87 | 0.02  |
| <i>NRIR</i>      | 1.19 | 0.03  | <i>NME9</i>      | 1.15 | 0.03  |
| <i>NUDT21</i>    | 0.81 | <0.05 | <i>NNAT</i>      | 1.13 | 0.03  |
| <i>NUDT8</i>     | 0.90 | 0.04  | <i>NOB1</i>      | 0.81 | 0.03  |
| <i>NUS1</i>      | 0.85 | 0.04  | <i>NPR3</i>      | 1.15 | 0.02  |
| <i>NUTM1</i>     | 0.79 | <0.05 | <i>NTRK3</i>     | 1.19 | <0.05 |
| <i>NXF4</i>      | 0.76 | 0.03  | <i>NUTM2D</i>    | 1.24 | 0.04  |



|  |                      |      |       |                  |      |       |
|--|----------------------|------|-------|------------------|------|-------|
|  | <i>OAZ3</i>          | 0.82 | <0.01 | <i>OR10G2</i>    | 0.84 | <0.05 |
|  | <i>OLIG1</i>         | 0.92 | 0.02  | <i>OR14I1</i>    | 0.89 | 0.04  |
|  | <i>OLIG2</i>         | 0.70 | 0.03  | <i>OR2F1</i>     | 1.14 | 0.03  |
|  | <i>OOSP2</i>         | 0.88 | <0.05 | <i>OR2H2</i>     | 1.32 | 0.02  |
|  | <i>OPN1MW</i>        | 1.17 | 0.02  | <i>OR2T11</i>    | 0.81 | 0.03  |
|  | <i>OR10H4</i>        | 0.75 | 0.03  | <i>OR2T8</i>     | 1.06 | <0.05 |
|  | <i>OR10W1</i>        | 1.15 | 0.01  | <i>OR52B4</i>    | 0.86 | 0.04  |
|  | <i>OR10Z1</i>        | 0.77 | 0.01  | <i>OR56A1</i>    | 0.75 | 0.04  |
|  | <i>OR2S2</i>         | 1.38 | <0.05 | <i>OR6C2</i>     | 1.21 | 0.01  |
|  | <i>OR2V2</i>         | 0.77 | <0.05 | <i>OR6F1</i>     | 0.84 | 0.02  |
|  | <i>OR3A2</i>         | 0.83 | 0.03  | <i>OR6M1</i>     | 0.82 | 0.03  |
|  | <i>OR4D10</i>        | 1.25 | 0.02  | <i>OVOL3</i>     | 0.82 | <0.01 |
|  | <i>OR4D9</i>         | 0.83 | 0.01  | <i>PAX2</i>      | 0.86 | 0.01  |
|  | <i>OR4F15</i>        | 0.78 | 0.01  | <i>PDHX</i>      | 0.85 | 0.04  |
|  | <i>OR4L1</i>         | 0.73 | <0.01 | <i>PDILT</i>     | 1.26 | 0.03  |
|  | <i>OR6C1</i>         | 1.20 | 0.02  | <i>PDZD7</i>     | 1.22 | 0.01  |
|  | <i>OR7A5</i>         | 0.82 | 0.02  | <i>PEX26</i>     | 0.84 | 0.03  |
|  | <i>ORMDL3</i>        | 1.28 | 0.01  | <i>PGBP</i>      | 1.23 | 0.01  |
|  | <i>PABPC1L2B-AS1</i> | 0.94 | 0.02  | <i>PGM2</i>      | 0.89 | <0.05 |
|  | <i>PACSIN3</i>       | 0.89 | <0.01 | <i>PHF10</i>     | 0.87 | 0.02  |
|  | <i>PARP1</i>         | 0.74 | 0.04  | <i>PIGR</i>      | 0.85 | 0.02  |
|  | <i>PCNA-AS1</i>      | 0.68 | <0.05 | <i>PKN2-AS1</i>  | 0.92 | 0.03  |
|  | <i>PDE1A</i>         | 0.87 | 0.02  | <i>PNLIPRP3</i>  | 1.14 | 0.04  |
|  | <i>PDX1</i>          | 0.89 | 0.02  | <i>PPDPFL</i>    | 0.83 | 0.04  |
|  | <i>PGLYRP4</i>       | 0.89 | 0.04  | <i>PPP1R2B</i>   | 0.71 | 0.03  |
|  | <i>PHF5A</i>         | 0.78 | <0.01 | <i>PRKX-AS1</i>  | 0.75 | 0.01  |
|  | <i>PIEZO2</i>        | 1.07 | <0.01 | <i>PRRX2-AS1</i> | 1.20 | 0.01  |
|  | <i>PLPBP</i>         | 0.79 | 0.01  | <i>PTCH2</i>     | 1.08 | 0.01  |
|  | <i>PLSCR5</i>        | 0.84 | 0.02  | <i>PTPRD-AS1</i> | 0.85 | 0.01  |
|  | <i>PNPLA5</i>        | 0.76 | 0.03  | <i>PYY</i>       | 0.82 | 0.02  |
|  | <i>POLA2</i>         | 0.85 | 0.03  | <i>RAB41</i>     | 0.85 | <0.05 |
|  | <i>POLD3</i>         | 0.83 | 0.03  | <i>RADIL</i>     | 1.37 | 0.03  |
|  | <i>POLDIP3</i>       | 0.78 | 0.01  | <i>RAP2A</i>     | 0.83 | <0.05 |
|  | <i>POM121L12</i>     | 1.21 | 0.03  | <i>RBFADN</i>    | 1.17 | 0.04  |
|  | <i>PPAT</i>          | 0.77 | 0.04  | <i>RBM46</i>     | 0.90 | 0.03  |
|  | <i>PPP2R5D</i>       | 0.71 | 0.02  | <i>REXO1</i>     | 0.88 | 0.04  |
|  | <i>PRMT3</i>         | 0.81 | 0.01  | <i>RFTNI</i>     | 0.90 | <0.05 |
|  | <i>PRX</i>           | 1.13 | <0.01 | <i>RFX1</i>      | 0.93 | 0.03  |
|  | <i>PSG8</i>          | 0.83 | 0.02  | <i>RHBG</i>      | 1.17 | <0.05 |

|  |                    |      |       |                    |      |       |
|--|--------------------|------|-------|--------------------|------|-------|
|  | <i>PTGES3</i>      | 0.85 | 0.04  | <i>RIMBP3B</i>     | 0.92 | <0.05 |
|  | <i>PTGIR</i>       | 1.09 | 0.04  | <i>RIPPLY3</i>     | 0.86 | 0.04  |
|  | <i>RAB9BP1</i>     | 0.70 | 0.01  | <i>RLN1</i>        | 1.37 | 0.03  |
|  | <i>RBBP8</i>       | 0.85 | 0.02  | <i>RMDN2</i>       | 0.87 | 0.03  |
|  | <i>RBM44</i>       | 1.19 | <0.01 | <i>RMDN2-AS1</i>   | 0.76 | 0.03  |
|  | <i>RBM48</i>       | 1.09 | 0.02  | <i>RNF208</i>      | 0.79 | 0.04  |
|  | <i>RGL4</i>        | 0.86 | 0.01  | <i>RNF214</i>      | 0.89 | 0.04  |
|  | <i>RHOA</i>        | 0.92 | <0.05 | <i>RPL21</i>       | 0.83 | <0.05 |
|  | <i>RPL34-DT</i>    | 1.24 | 0.01  | <i>RPL32</i>       | 0.74 | 0.01  |
|  | <i>RPS19BP1</i>    | 0.82 | 0.03  | <i>RPS16</i>       | 0.85 | 0.03  |
|  | <i>RPS6KA2-AS1</i> | 1.12 | <0.01 | <i>RPS18</i>       | 0.85 | <0.01 |
|  | <i>RPSAP52</i>     | 0.75 | 0.03  | <i>RRP9</i>        | 0.81 | 0.02  |
|  | <i>RPUSD2</i>      | 0.76 | 0.03  | <i>SCARF2</i>      | 1.16 | 0.03  |
|  | <i>RRP12</i>       | 0.85 | 0.04  | <i>SCG5</i>        | 1.14 | 0.04  |
|  | <i>RRP8</i>        | 0.75 | 0.02  | <i>SDCBPP2</i>     | 1.22 | 0.01  |
|  | <i>RSPO1</i>       | 1.21 | 0.01  | <i>SELENOH</i>     | 0.85 | 0.04  |
|  | <i>RUVBL2</i>      | 0.72 | 0.02  | <i>SF3A2</i>       | 0.83 | 0.04  |
|  | <i>RXRG</i>        | 0.88 | 0.04  | <i>SIGLEC11</i>    | 1.39 | <0.01 |
|  | <i>SAAL1</i>       | 0.79 | <0.05 | <i>SIGLECL1</i>    | 0.84 | 0.01  |
|  | <i>SAP18</i>       | 0.76 | <0.01 | <i>SIT1</i>        | 1.22 | <0.01 |
|  | <i>SCOC-AS1</i>    | 1.21 | 0.01  | <i>SLC22A12</i>    | 0.92 | 0.01  |
|  | <i>SCTR</i>        | 1.18 | 0.01  | <i>SLC27A3</i>     | 0.90 | 0.04  |
|  | <i>SDC4</i>        | 1.34 | 0.04  | <i>SLC35G3</i>     | 1.24 | 0.02  |
|  | <i>SEC14L2</i>     | 1.28 | 0.03  | <i>SLC35G5</i>     | 1.32 | 0.03  |
|  | <i>SEC24C</i>      | 0.95 | 0.04  | <i>SLC38A3</i>     | 0.88 | 0.03  |
|  | <i>SEC31B</i>      | 1.37 | 0.02  | <i>SLC49A3</i>     | 0.88 | 0.01  |
|  | <i>SEPTIN14P20</i> | 1.48 | 0.02  | <i>SLC7A3</i>      | 0.86 | 0.03  |
|  | <i>SERPINA4</i>    | 0.89 | 0.04  | <i>SMAD1-AS2</i>   | 0.67 | <0.01 |
|  | <i>SET</i>         | 0.69 | 0.01  | <i>SMTNL2</i>      | 1.21 | 0.02  |
|  | <i>SETD4</i>       | 1.17 | <0.05 | <i>SNORA30</i>     | 1.42 | 0.04  |
|  | <i>SFMBT2</i>      | 1.32 | 0.01  | <i>SNORD113-7</i>  | 0.81 | 0.02  |
|  | <i>SFTPB</i>       | 1.30 | 0.03  | <i>SNORD114-6</i>  | 1.77 | <0.05 |
|  | <i>SGF29</i>       | 0.71 | 0.01  | <i>SNORD116-30</i> | 1.45 | <0.05 |
|  | <i>SIGLEC6</i>     | 0.84 | 0.02  | <i>SNORD116-5</i>  | 1.25 | 0.03  |
|  | <i>SIRPD</i>       | 1.18 | 0.04  | <i>SNRPEP2</i>     | 0.82 | 0.02  |
|  | <i>SKA3</i>        | 0.64 | 0.04  | <i>SPATA32</i>     | 1.30 | 0.04  |
|  | <i>SLA</i>         | 1.11 | <0.05 | <i>SPDYE3</i>      | 0.50 | 0.02  |
|  | <i>SLAMF1</i>      | 1.15 | 0.04  | <i>SPG21</i>       | 0.82 | <0.05 |
|  | <i>SLC27A1</i>     | 1.36 | 0.01  | <i>SPO11</i>       | 1.10 | 0.01  |

|  |                   |      |       |                    |      |       |
|--|-------------------|------|-------|--------------------|------|-------|
|  | <i>SLC5A8</i>     | 1.25 | <0.05 | <i>SPRNPI</i>      | 0.86 | 0.01  |
|  | <i>SMARCB1</i>    | 0.82 | 0.03  | <i>SPRR2C</i>      | 1.25 | <0.01 |
|  | <i>SMDT1</i>      | 0.86 | 0.04  | <i>SPRR4</i>       | 1.19 | 0.04  |
|  | <i>SMIM18</i>     | 1.15 | <0.05 | <i>STMN2</i>       | 0.70 | 0.02  |
|  | <i>SNORA35</i>    | 1.15 | <0.05 | <i>STMN4</i>       | 1.40 | 0.01  |
|  | <i>SNORD59B</i>   | 1.38 | 0.03  | <i>SUMO1</i>       | 1.36 | 0.03  |
|  | <i>SNRNP40</i>    | 0.81 | 0.03  | <i>TAC4</i>        | 1.18 | 0.04  |
|  | <i>SNRPD2</i>     | 0.78 | 0.03  | <i>TAF1A</i>       | 1.19 | 0.01  |
|  | <i>SNRPD3</i>     | 0.76 | <0.05 | <i>TAT-ASI</i>     | 1.24 | 0.02  |
|  | <i>SNRPF</i>      | 0.68 | 0.04  | <i>TBX15</i>       | 1.20 | 0.02  |
|  | <i>SPANXN4</i>    | 1.41 | 0.01  | <i>TDGF1P3</i>     | 1.33 | 0.01  |
|  | <i>SPATA31A1</i>  | 1.06 | <0.05 | <i>TEX29</i>       | 1.42 | 0.02  |
|  | <i>SPON1</i>      | 1.28 | 0.01  | <i>TLR7</i>        | 1.17 | <0.05 |
|  | <i>SRGAP2-ASI</i> | 0.69 | <0.01 | <i>TM4SF18</i>     | 1.19 | 0.01  |
|  | <i>SSI8L2</i>     | 0.84 | 0.04  | <i>TMEM141</i>     | 0.89 | 0.02  |
|  | <i>ST7-AS2</i>    | 0.83 | 0.01  | <i>TMEM212-ASI</i> | 1.17 | 0.01  |
|  | <i>STEAP1B</i>    | 1.21 | 0.01  | <i>TMEM244</i>     | 1.23 | 0.04  |
|  | <i>SUCLA2-ASI</i> | 0.71 | 0.04  | <i>TMEM26-ASI</i>  | 0.91 | 0.04  |
|  | <i>SYNJ2</i>      | 1.11 | 0.02  | <i>TMEM30CP</i>    | 1.13 | 0.01  |
|  | <i>TAF3</i>       | 0.79 | 0.03  | <i>TMEM72-ASI</i>  | 0.75 | 0.02  |
|  | <i>TAS2R16</i>    | 1.33 | 0.03  | <i>TMEM88B</i>     | 0.87 | 0.02  |
|  | <i>TASL</i>       | 1.22 | 0.01  | <i>TNFSF11</i>     | 1.13 | 0.04  |
|  | <i>TBL2</i>       | 0.79 | 0.04  | <i>TNK2-ASI</i>    | 0.94 | 0.01  |
|  | <i>TEX22</i>      | 0.83 | 0.01  | <i>TPI1P3</i>      | 1.49 | 0.04  |
|  | <i>TEX28</i>      | 0.91 | <0.05 | <i>TRAV12-3</i>    | 1.28 | 0.01  |
|  | <i>TEX35</i>      | 1.12 | <0.05 | <i>TRAV7</i>       | 0.86 | 0.02  |
|  | <i>TEX41</i>      | 0.84 | 0.02  | <i>TRAV8-7</i>     | 0.90 | 0.04  |
|  | <i>TGMI</i>       | 0.83 | <0.01 | <i>TRBV10-2</i>    | 0.77 | 0.02  |
|  | <i>THEMIS</i>     | 0.85 | <0.05 | <i>TRBV7-4</i>     | 1.41 | 0.01  |
|  | <i>THOP1</i>      | 0.85 | <0.01 | <i>TTLL1</i>       | 1.26 | 0.03  |
|  | <i>TIFAB</i>      | 1.34 | 0.01  | <i>UTF1</i>        | 1.18 | 0.02  |
|  | <i>TK2</i>        | 1.22 | 0.01  | <i>VENTX</i>       | 1.19 | <0.01 |
|  | <i>TM6SF1</i>     | 1.27 | 0.04  | <i>VSTM2A-OT1</i>  | 1.18 | 0.01  |
|  | <i>TMEM132E</i>   | 1.17 | 0.03  | <i>WDR88</i>       | 0.87 | 0.04  |
|  | <i>TMEM140</i>    | 1.47 | 0.03  | <i>WHAMMP3</i>     | 1.15 | 0.01  |
|  | <i>TMEM252</i>    | 0.78 | 0.03  | <i>WNT7A</i>       | 0.70 | 0.03  |
|  | <i>TMEM40</i>     | 1.21 | <0.05 | <i>XLOC_009911</i> | 1.52 | 0.01  |
|  | <i>TMEM41B</i>    | 1.31 | 0.03  | <i>ZNF157</i>      | 1.61 | 0.02  |
|  | <i>TMEM70</i>     | 0.86 | 0.03  | <i>ZNF322</i>      | 0.92 | <0.01 |

|  |                   |      |       |               |      |       |
|--|-------------------|------|-------|---------------|------|-------|
|  | <i>TMEM74</i>     | 0.79 | 0.04  | <i>ZNF667</i> | 0.90 | 0.03  |
|  | <i>TNFRSF17</i>   | 1.12 | 0.04  | <i>ZPLD1</i>  | 0.87 | <0.05 |
|  | <i>TOMM40</i>     | 0.60 | 0.04  |               |      |       |
|  | <i>TRAJ13</i>     | 1.31 | <0.05 |               |      |       |
|  | <i>TRAJ37</i>     | 1.41 | 0.02  |               |      |       |
|  | <i>TRAJ56</i>     | 1.26 | <0.05 |               |      |       |
|  | <i>TRAJ9</i>      | 1.55 | 0.04  |               |      |       |
|  | <i>TRDJ2</i>      | 1.22 | 0.02  |               |      |       |
|  | <i>TRIM49B</i>    | 0.85 | 0.03  |               |      |       |
|  | <i>TRIM51EP</i>   | 1.16 | <0.05 |               |      |       |
|  | <i>TRIM68</i>     | 1.13 | 0.03  |               |      |       |
|  | <i>TRMO</i>       | 0.93 | 0.03  |               |      |       |
|  | <i>TRMT44</i>     | 1.11 | <0.05 |               |      |       |
|  | <i>TRPM3</i>      | 0.94 | 0.04  |               |      |       |
|  | <i>TSPO2</i>      | 1.26 | 0.02  |               |      |       |
|  | <i>TSR3</i>       | 0.77 | 0.03  |               |      |       |
|  | <i>TTC3</i>       | 1.21 | 0.03  |               |      |       |
|  | <i>TTY5</i>       | 0.82 | 0.03  |               |      |       |
|  | <i>TUBA3D</i>     | 0.81 | <0.01 |               |      |       |
|  | <i>TUBA4B</i>     | 0.82 | 0.01  |               |      |       |
|  | <i>TUSC1</i>      | 0.83 | 0.04  |               |      |       |
|  | <i>UBE2D2</i>     | 0.78 | 0.01  |               |      |       |
|  | <i>UBE2I</i>      | 0.77 | <0.05 |               |      |       |
|  | <i>UBE2S</i>      | 0.66 | 0.02  |               |      |       |
|  | <i>UBTFL1</i>     | 0.73 | 0.03  |               |      |       |
|  | <i>UGT2A2</i>     | 1.35 | 0.02  |               |      |       |
|  | <i>UNC13C</i>     | 1.22 | 0.04  |               |      |       |
|  | <i>USH1G</i>      | 0.80 | <0.05 |               |      |       |
|  | <i>USP1</i>       | 0.78 | 0.01  |               |      |       |
|  | <i>USP17L10</i>   | 1.34 | <0.01 |               |      |       |
|  | <i>VSX2</i>       | 0.91 | 0.01  |               |      |       |
|  | <i>VWA5B1</i>     | 0.72 | 0.02  |               |      |       |
|  | <i>WFDC1</i>      | 1.16 | 0.03  |               |      |       |
|  | <i>WFDC13</i>     | 1.32 | 0.02  |               |      |       |
|  | <i>WFIKK2</i>     | 1.11 | 0.04  |               |      |       |
|  | <i>YDJC</i>       | 0.81 | 0.04  |               |      |       |
|  | <i>ZBTB9</i>      | 0.77 | 0.02  |               |      |       |
|  | <i>ZC3H18-AS1</i> | 1.15 | <0.01 |               |      |       |
|  | <i>ZCCHC10</i>    | 0.81 | <0.01 |               |      |       |

|  |                   |      |       |  |  |  |
|--|-------------------|------|-------|--|--|--|
|  | <i>ZKSCAN1</i>    | 1.25 | 0.04  |  |  |  |
|  | <i>ZNF273</i>     | 1.20 | 0.03  |  |  |  |
|  | <i>ZNF365</i>     | 1.23 | 0.04  |  |  |  |
|  | <i>ZNF436-AS1</i> | 1.17 | <0.01 |  |  |  |
|  | <i>ZNF549</i>     | 1.34 | 0.02  |  |  |  |
|  | <i>ZNF579</i>     | 0.95 | 0.03  |  |  |  |
|  | <i>ZNF593</i>     | 0.77 | 0.01  |  |  |  |
|  | <i>ZNF677</i>     | 0.74 | 0.02  |  |  |  |
|  | <i>ZNF705A</i>    | 1.31 | 0.04  |  |  |  |
|  | <i>ZNF705D</i>    | 0.80 | 0.04  |  |  |  |
|  | <i>ZNF771</i>     | 0.87 | 0.04  |  |  |  |
|  | <i>ZNF781</i>     | 1.18 | <0.05 |  |  |  |
|  | <i>ZNF833P</i>    | 1.45 | 0.03  |  |  |  |
|  | <i>ZNF876P</i>    | 1.45 | 0.01  |  |  |  |
|  | <i>ZNF91</i>      | 1.19 | 0.03  |  |  |  |

## Supplemental References

1. Kim, J.H.; Park, S.; Lim, S.M.; Eom, H.J.; Balch, C.; Lee, J.; Kim, G.J.; Jeong, J.H.; Nam, S.; Kim, Y.H. Rational design of small molecule RHOA inhibitors for gastric cancer. *Pharmacogenomics J* **2020**, *20*, 601-612, doi:10.1038/s41397-020-0153-6.
2. Barretina, J.; Caponigro, G.; Stransky, N.; Venkatesan, K.; Margolin, A.A.; Kim, S.; Wilson, C.J.; Lehar, J.; Kryukov, G.V.; Sonkin, D.; et al. The Cancer Cell Line Encyclopedia enables predictive modelling of anticancer drug sensitivity. *Nature* **2012**, *483*, 603-607, doi:10.1038/nature11003.
3. Ikari, N.; Serizawa, A.; Tanji, E.; Yamamoto, M.; Furukawa, T. Analysis of RHOA mutations and their significance in the proliferation and transcriptome of digestive tract cancer cells. *Oncol Lett* **2021**, *22*, 735, doi:10.3892/ol.2021.12996.
4. Alkasalias, T.; Alexeyenko, A.; Hennig, K.; Danielsson, F.; Lebbink, R.J.; Fielden, M.; Turunen, S.P.; Lehti, K.; Kashuba, V.; Madapura, H.S.; et al. RhoA knockout fibroblasts lose tumor-inhibitory capacity in vitro and promote tumor growth in vivo. *Proc Natl Acad Sci U S A* **2017**, *114*, E1413-E1421, doi:10.1073/pnas.1621161114.
